22 **ABSTRACT**

23 Metabolic regulation has proven to play a critical role in T cell antitumor immunity. Cholesterol  
24 metabolism is a key component of this response but remains largely unexplored. Herein, we found  
25 that the LDL receptor (LDLR), which has been previously identified as a transporter for cholesterol  
26 and fatty acids, plays a pivotal role in regulating CD8<sup>+</sup> T cell antitumor activity, with the genetic  
27 ablation of LDLR significantly attenuating CD8<sup>+</sup> T cell activation and clonal expansion.  
28 Additionally, we found that LDLR interacts with the T-cell receptor (TCR) signalosome and  
29 regulates TCR signaling, facilitating CD8<sup>+</sup> T cell activation and effector function. Furthermore, we  
30 found that the tumor microenvironment downregulates CD8<sup>+</sup> T cell LDLR levels and TCR signaling  
31 via tumor cell-derived PCSK9, which binds and prevents the recycling of LDLR and TCR into the  
32 plasma membrane. Our findings indicate that genetic deletion or pharmacological inhibition of  
33 PCSK9 in tumor cells can enhance the antitumor activity of CD8<sup>+</sup> T cells by alleviating the tumor  
34 microenvironment's suppressive effect on CD8<sup>+</sup> T cells and consequently inhibit tumor progression.  
35 While previously established as a hyperlipidemia target, this study highlights PCSK9 as a potential  
36 target for cancer immunotherapy as well.

37

## 38 INTRODUCTION

39 CD8<sup>+</sup> T cell-based immunotherapy has emerged as one of the most important cancer therapeutic  
40 strategies. Particular success has been seen with new approaches like immune checkpoint blockade  
41 (ICB), targeting PD-1 and CTLA4, and chimeric antigen receptor T (CAR-T) cell therapy, both of  
42 which have been approved for the treatment of a variety of cancers (Leach et al., 1996; Morgan et  
43 al., 2006; Wolchok et al., 2013; Maude et al., 2014). Despite the clinical successes, the efficacy of  
44 CD8<sup>+</sup>T cell-based immunotherapy varies substantially across malignancies and individuals (Maus  
45 et al., 2013; Rizvi et al., 2015; Neelapu et al., 2018; Rafiq et al., 2020). As such, further investigation  
46 into the regulatory mechanisms and efficacy factors of immune therapy is warranted.

47 Mechanistically, once activated by tumor antigens peripheral CD8<sup>+</sup> T cells will traffic to the tumor  
48 microenvironment (TME) and mediate antitumor responses (Borst et al., 2018). However, the TME  
49 possesses numerous immunosuppressive properties, primarily mediated by immune suppressive  
50 stromal cells, myeloid cells, lymphoid cells, and tumor cells themselves, limiting the antitumor  
51 activity of CD8<sup>+</sup> T cells. While these immunosuppressive cells are the main cause of immunotherapy  
52 failure (Draghiciu et al., 2015; Kalluri, 2016; Kumar et al., 2017; Mantovani et al., 2017; Togashi  
53 et al., 2019), a lack of nutrients—such as glucose and lipids—as well as hypoxia in the TME are  
54 also correlated with CD8<sup>+</sup> T cell dysfunction (Chang et al., 2015; Bunse et al., 2018; Gourdin et al.,  
55 2018; Leone et al., 2019; Baumann et al., 2020). These previous studies suggest that the metabolic  
56 regulation by the TME plays a critical role in CD8<sup>+</sup> T cell suppression (Sukumar et al., 2013; Ho et  
57 al., 2015; Patsoukis et al., 2015; Zhang et al., 2017; Wang and Zou, 2020).

58 Metabolic regulation has been shown to play critical roles in T cell differentiation and effector  
59 function (Almeida et al., 2016; Kishton et al., 2017; Patel and Powell, 2017). As the primary  
60 component of lipids, cholesterol metabolism in particular is essential for CD8<sup>+</sup> T cell function and  
61 its reprogramming has induced significant alterations to CD8<sup>+</sup> T cell activation (Kidani et al., 2013;  
62 Wang et al., 2016; Yang et al., 2016). Recent studies have also highlighted the importance of cellular  
63 cholesterol metabolism in regulating the antitumor efficacy of CD8<sup>+</sup> T cells (Yang et al., 2016; Ma  
64 et al., 2018; Ma et al., 2019; Ma et al., 2020). However, the mechanisms by which the TME  
65 reprograms CD8<sup>+</sup> T cell cholesterol metabolism, and to what extent this impacts tumor immune  
66 evasion, remains unknown.

67 To examine how cholesterol metabolism modulates T cell function in the TME, we measured the  
68 cholesterol levels of intratumoral CD8<sup>+</sup> T cells. We found that intratumoral CD8<sup>+</sup> T cells have  
69 reduced cholesterol levels, resulting from the LDLR (Low Density Lipoprotein Receptor) deficiency.  
70 Furthermore, we elucidated that LDLR plays a key role in T cells' tumoricidal effects. In addition  
71 to controlling the uptake of LDL, LDLR also interacts with CD3, a subunit of the T-cell receptor  
72 (TCR) complex, modulating the TCR signaling pathway. Additionally, it has been reported  
73 previously that PCSK9 regulates the degradation of LDLR, consequently blocking cholesterol  
74 uptake (Garcia et al., 2001; Rudenko et al., 2002; Maxwell et al., 2005; Kwon et al., 2008; Poirier  
75 et al., 2008). Upon investigation, we found that PCSK9 was highly expressed in tumors and  
76 constantly released into the TME, and that this secretion of PCSK9 dampened the immune response  
77 of CD8<sup>+</sup> T cells via hindering LDLR expression and ultimately inhibited TCR signaling and effector  
78 function. These findings highlight the PCSK9-LDLR regulatory network as a novel potential target  
79 in cancer immunotherapy.

80

81



## 82 RESULTS

### 83 LDLR deficiency hinders the antitumor activity of CD8<sup>+</sup> T cells.

84 Antigen recognition induces cholesterol metabolic reprogramming in CD8<sup>+</sup> T cells, which  
85 enables the cells to acquire sufficient cholesterol to support clonal expansion and effector function  
86 (Zech et al., 2009; Kidani et al., 2013; Yang et al., 2016; Newton et al., 2018). The tumor  
87 microenvironment has been demonstrated as a hypoxia and nutrient restricted environment (Chang  
88 et al., 2015; Semenza, 2016; Zhang and Ertl, 2016; Cascone et al., 2018). Whether there is sufficient  
89 cholesterol in the TME to support CD8<sup>+</sup> T cells' antitumor activity, and if not how CD8<sup>+</sup> T cells  
90 acquire sufficient cholesterol in such an environment, is unknown. To investigate, we analyzed the  
91 Apolipoprotein B (APOB) levels of clinical cancer samples and syngeneic mouse tumor samples.  
92 We found that the APOB level, which represents the LDL/cholesterol level, was significantly higher  
93 in the tumor regions than the paracancerous normal tissues (**Supplementary figure 1a-f**). In  
94 contrast, the cellular cholesterol levels of tumor infiltrating CD8<sup>+</sup> T cells from MC38 tumor  
95 burdened syngeneic mice were lower than that of the splenic CD8<sup>+</sup> T cells, when quantified by  
96 Filipin III staining (**Supplementary figure 1g, h**). These findings indicate that the reduced cellular  
97 cholesterol in CD8<sup>+</sup> T cells may be due to an aspect of the T cells themselves.

98 We then further evaluated the cholesterol metabolic program of tumor-infiltrating CD8<sup>+</sup> T cells.  
99 In addition to reduced cholesterol biosynthesis (**Supplementary figure 1i-l**), we found that  
100 LDLR—which has been previously identified as a transporter for LDL/cholesterol (Gent and  
101 Braakman, 2004; Kwon et al., 2008)—mRNA levels in tumor infiltrating CD8<sup>+</sup> T cells were much  
102 lower than in the activated cytotoxic CD8<sup>+</sup> T cells (CTLs) from adoptive CTL transfer therapy in  
103 MC38 tumor burdened mice (**Figure 1a**). The reduced surface LDLR levels in tumor infiltrating  
104 CD8<sup>+</sup> T cells was further validated by flow cytometric analysis (**Figure 1b**).

105 To determine the physiological functions of LDLR in CD8<sup>+</sup> T cells, we isolated splenic CD8<sup>+</sup> T  
106 cells from *Ldlr*<sup>-/-</sup> mice showing normal T cell development (**Supplementary figure 1n, o**). When  
107 compared with the wild-type CD8<sup>+</sup> T cells, the *Ldlr*<sup>-/-</sup> CD8<sup>+</sup> T cells showed impaired effector  
108 function, such as reduced cytokine and granule production, as well as lower clonal expansion rate  
109 (**Figure 1c, d**). To further assess the involvement of LDLR in the immune responses of CD8<sup>+</sup> T cells  
110 *in vivo*, we generated antigen-specific and LDLR deficient CD8<sup>+</sup> T cells by crossing OT-I transgenic

111 mice and *Ldlr*<sup>-/-</sup> mice. We then generated *Ldlr*<sup>-/-</sup> OT-I CTLs via pulsing splenocytes with OVA<sub>257-264</sub>  
112 peptides (SIINFEKL). We found that LDLR deficiency induced the defect of immunological  
113 synapse formation (**Figure 1e**) and impaired cytotoxicity to tumor cells when we cocultured these  
114 CTLs with OVA<sub>257-264</sub> loaded EL4 cells (**Figure 1f**). We then transferred the OT-I CTLs to the  
115 ovalbumin expressing MC38 tumor (MC38-OVA) mice. We found that *Ldlr* depletion indeed  
116 impaired the antitumor activity of CD8<sup>+</sup> T cells, with the mice showing more advanced tumor  
117 progression (**Figure 1g, h**). In contrast, the overexpression of LDLR in OT-I CTLs enhanced the  
118 antitumor activity of CD8<sup>+</sup> T cells both *in vitro* and *in vivo* (**Figure 1i-m**). Together, these results  
119 demonstrate that LDLR intrinsically regulates CD8<sup>+</sup> T cell immune response and antitumor activity.

## 120 **The regulation of LDLR on CD8<sup>+</sup> T cell effector function is not fully dependent on** 121 **LDL/cholesterol**

122 The primary function of the LDLR is to mediate the endocytosis of cholesterol enriched LDL and  
123 maintain the plasma levels of LDL (Jeon and Blacklow, 2005; Go and Mani, 2012). On the cellular  
124 level, LDL derived cholesterol is one of the resources necessary for CD8<sup>+</sup> T cell proliferation and  
125 effector function (Kidani et al., 2013; Yang et al., 2016; Proto et al., 2018). To evaluate the role of  
126 LDL in CD8<sup>+</sup> T cell function and further assess the function of LDLR, we first measured the LDL  
127 uptake in LDLR deficient CD8<sup>+</sup> T cells. The results exhibited that LDL uptake in CD8<sup>+</sup> T cells was  
128 completely dependent on LDLR (**Figure 2a**). Furthermore, we found that depleting the LDL in the  
129 medium substantially inhibited CD8<sup>+</sup> T cell proliferation (**Figure 2a**). These findings demonstrate  
130 that LDLR mediated LDL uptake is essential for CD8<sup>+</sup> T cell clonal expansion.

131 CD8<sup>+</sup> T cells experience cholesterol metabolic reprogramming when T-cell receptor (TCR)  
132 recognize the antigens. After which, the LDLR surface levels were dramatically increased in CTLs  
133 as compared with the naïve CD8<sup>+</sup> cells (**Figure 2c**). To further evaluate the role of LDL in the  
134 effector function of CTLs, we re-stimulated the CTLs with anti-CD3 and anti-CD28 antibodies in  
135 medium supplemented with or without LDL. These results showed that a LDLR deficiency impaired  
136 CTL effector function, but that this effect could be lessened when supplemented with LDL (**Figure**  
137 **2d, e**). CTL killing assay further verified this conclusion (**Figure 2f**).

138 Cholesterol is the dominant component of LDL, and we found that the cholesterol levels of LDLR  
139 deficient CTLs were decreased, especially in the plasma membrane. Previous studies have

140 demonstrated that the plasma membrane is involved in T cell activation (Gaus et al., 2005; Wu et  
141 al., 2016). To investigate whether LDLR-deficiency impaired CD8<sup>+</sup> T cell effector function is reliant  
142 on plasma membrane cholesterol, we artificially increased the plasma membrane cholesterol levels  
143 of *Ldlr* knockout CTLs by adding M $\beta$ CD-coated cholesterol, providing a cholesterol source  
144 independent of LDLR expression (**Figure 2g**). We then stimulated CTLs with anti-CD3 and anti-  
145 CD28 antibodies and evaluated cytokine production by flow cytometry. The results showed that  
146 increasing plasma membrane cholesterol did not improve the LDLR deficiency-induced effector  
147 function decline (**Figure 2h**). These data indicate that there is a mechanism by which LDLR  
148 regulates CD8<sup>+</sup> T cell effector function, one which is not dependent on LDL or cholesterol.

#### 149 **LDLR binds to TCR and regulates TCR signaling in CD8<sup>+</sup> T cells**

150 We then further investigated the underlying mechanisms by which LDLR regulates CD8<sup>+</sup> T cell  
151 effector function. Notably, our results showed no significant differences in cytokine and granule  
152 production before antibody stimulation (**Figure 1c**), the defects of the *Ldlr* knockout appeared to be  
153 induced by anti-CD3 and anti-CD28 stimulation. Anti-CD3 and anti-CD28 stimulation mimics  
154 antigen recognition by the T-cell receptor (TCR) and the costimulatory signals by CD80/CD86-  
155 CD28 ligation, respectively (Trickett and Kwan, 2003). Previous studies have demonstrated that  
156 TCR mediated antigen recognition, or TCR signaling, is influenced by multiple factors, including  
157 kinases, phosphatases, and the plasma membrane lipid and protein composition (van der Merwe and  
158 Dushek, 2011; Stanford et al., 2012; Shi et al., 2013; Alcover et al., 2018). To evaluate the effect of  
159 LDLR deficiency on TCR signaling, we stimulated *Ldlr*<sup>-/-</sup> CD8<sup>+</sup> T cells with anti-CD3 and anti-  
160 CD28. We then detected the phosphorylation level of CD3 $\zeta$ , a subunit of the TCR complex, and  
161 downstream signal pathways. The results showed that CD3 $\zeta$  phosphorylation was inhibited by  
162 LDLR deficiency, as compared with the wild-type cells (**Figure 3a**). Consequently, the downstream  
163 signal pathways were also attenuated by LDLR deficiency (**Figure 3b**). Furthermore, the defects in  
164 TCR phosphorylation were not altered when we stripped cholesterol from the plasma membrane via  
165 M $\beta$ CD treatment (**Figure 3c**). Together, these results suggest that LDLR may directly regulate TCR  
166 on the plasma membrane or the membrane proximal region.

167 We next stained CD8<sup>+</sup> T cells with anti-LDLR and anti-CD3 to determine the localization of these  
168 two proteins on the plasma membrane. Imaging data showed that LDLR colocalizes with CD3 on

169 the plasma membrane of CD8<sup>+</sup> T cells (**Figure 3d**). To further corroborate the interaction between  
170 LDLR and TCR complex, we used a PLA assay (Proximal Ligation Assay) to image the interaction.  
171 Confocal imaging data exhibited clear interaction spots in wild-type CD8<sup>+</sup> T cells, but not in *Ldlr*<sup>-/-</sup>  
172 CD8<sup>+</sup> T cells (**Figure 3e**). Furthermore, TIRFM (Total Internal Reflection Fluorescence Microscopy)  
173 imaging showed the interaction of the LDLR and TCR complexes in the plasma membrane or the  
174 membrane proximal region of CD8<sup>+</sup> T cells (**Figure 3e**). We then used a co-immunoprecipitation  
175 assay to determine the interaction between the CD3 subunit of TCR and LDLR. The results showed  
176 that there is indeed an interaction between the CD3 subunit and LDLR, and that this interaction is  
177 not influenced by the removal of plasma membrane cholesterol by M $\beta$ CD (**Figure 3f, g**).

178 Additionally, we found that the surface TCR levels were reduced in *Ldlr*<sup>-/-</sup> CD8<sup>+</sup> T cells. To  
179 investigate further, we inhibited plasma membrane protein recycling via treatment with Brefeldin A  
180 and compared the surface TCR plasma membrane levels between *Ldlr*<sup>-/-</sup> and wild-type CD8<sup>+</sup> T cells  
181 (**Figure 3h, i**). These results thus suggest that LDLR may be involved in plasma membrane TCR  
182 recycling, thereby regulating TCR signaling and ultimately T cell effector function (**Supplementary**  
183 **figure 2**). Together, these experiments indicate that LDLR interacts with the TCR complex and  
184 regulates TCR signaling as an immune regulatory membrane protein, not just as a LDL transporter.

### 185 **Tumor-derived PCSK9 inhibits the antitumor activity of CD8<sup>+</sup> T cells**

186 To further investigate how the TME inhibits the LDLR level of tumor infiltrating CD8<sup>+</sup> T cells,  
187 we transferred OT-I CTLs to *Rag2*<sup>-/-</sup> mice with MC38-OVA tumors. Then, we isolated the tumor  
188 infiltrating antigen specific CD8<sup>+</sup> T cells and quantified the mRNA levels and cell surface expression  
189 of LDLR by qPCR and flow cytometry, respectively. The results show that cell surface LDLR levels  
190 were dramatically decreased during early stage T cell infiltration, while conversely, the mRNA  
191 levels remained normal (**Figure 4a, b**). This finding indicates that there is another pathway that  
192 regulates the cell surface LDLR levels besides transcriptional regulation.

193 PCSK9, a previously identified LDLR modulator and a therapeutic drug target for treating  
194 hypercholesterolemia, has been implicated in a critical role for regulating LDLR protein levels via  
195 mediating LDLR internalization and degradation (Abifadel et al., 2003; Maxwell et al., 2005;  
196 Cunningham et al., 2007; Zhang et al., 2007; Liu et al., 2020). To determine PCSK9 involvement in  
197 surface LDLR regulation, we first collected clinical samples of colorectal cancer (CRC) and

198 detected PCSK9 expression by immunohistochemistry (IHC). IHC scoring showed there was higher  
199 PCSK9 expression in cancerous regions than in the adjacent normal region (**Figure 4c, f**).  
200 Furthermore, when we detected the CD3 levels in the CRC samples, we found there was a significant  
201 negative correlation between CD3<sup>+</sup> T cell infiltration and PCSK9 level (**Figure 4d, e**).

202 To further evaluate the relationship of T cell infiltration and PCSK9 expression in tumors, we  
203 depleted *Pcsk9* gene expression in a mouse CRC cell line (MC38) and melanoma cell line (B16F10)  
204 via CRISPR/Cas9. We then transplanted the gene modified tumor cells into wild-type syngeneic  
205 mice. The results showed that PCSK9 depletion inhibited tumor progression and greatly extended  
206 mice survival time (**Figure 4g-j**). Conversely, when we transplanted the MC38 tumor cells to *Rag2*<sup>-/-</sup>  
207 mice, exhibiting T cell and B cell deficiency, we found there were no significant differences  
208 between the wild-type MC38 and *Pcsk9* knockout MC38 mice (**Figure 4k, l**). A similar result was  
209 achieved by using shRNA to induce *Pcsk9* knockdown in MC38 tumor (**Supplementary figure 3a-**  
210 **e**), where the tumor infiltrating CD8<sup>+</sup> T cells in *Pcsk9*-knockdown tumors showed increased  
211 antitumor activity (**Supplementary figure 3f**). These findings indicate that the lower progression of  
212 *Pcsk9* knockout tumor in immunocompetent mice may be attributed to the antitumor activity of  
213 adoptive immune cells, like T cells and B cells. Given that CD8<sup>+</sup> T cells play critical roles in  
214 antitumor immunity, we used anti-CD8 antibody to deplete CD8<sup>+</sup> T cells *in vivo*, to determine on  
215 which cell type the impact of PCSK9 was most prominent. Our data showed that when CD8<sup>+</sup> T cells  
216 were depleted, there were no significant differences between the wild-type MC38 and the *Pcsk9*-  
217 knockout MC38 tumors in the syngeneic immunocompetent mice (**Figure 4m, n**). Collectively,  
218 these results demonstrate that the tumor derived PCSK9 predominantly inhibits the immune  
219 response of CD8<sup>+</sup> T cells in achieving immune evasion.

220 Notably, we also investigated the intrinsic effect of PCSK9 on CD8<sup>+</sup> T cells. The syngeneic  
221 mouse tumor model showed that tumor progression was inhibited in *Pcsk9*<sup>-/-</sup> mice when compared  
222 with the wild-type mice. We further stimulated the splenic naïve CD8<sup>+</sup> T cells from *Pcsk9*<sup>-/-</sup> mice  
223 with anti-CD3 and anti-CD28 antibodies to detect cytokine and granule production. The results  
224 showed PCSK9-deficient CD8<sup>+</sup> T cells exhibited higher effector function. Moreover, we found that  
225 PCSK9 intrinsically inhibited CD8<sup>+</sup> T cell function through evaluating the immunological synapse  
226 formation and cytotoxicity as well as antitumor activity *in vivo* through adoptive T cell transfer  
227 assay. These findings indicate that PCSK9 intrinsically inhibits the antitumor activity of CD8<sup>+</sup> T

228 cells.

### 229 **PCSK9 inhibits CD8<sup>+</sup> T cell antitumor activity via LDLR and TCR signaling inhibition**

230 To further investigate the mechanisms behind how PCSK9 regulates CD8<sup>+</sup> T cell antitumor  
231 activity, we transplanted wild-type MC38-OVA or *Pcsk9*-depleted MC38-OVA cells into *Rag2*<sup>-/-</sup>  
232 mice. We then transferred wild-type OT-I CTLs or *Ldlr*<sup>-/-</sup> OT-I CTLs into the tumor burdened mice.  
233 The results showed that there was no significant difference in tumor progression between the wild-  
234 type MC38 tumor and *Pcsk9*-depleted MC38 tumor in *Rag2*<sup>-/-</sup> mice who did not receive the CTL  
235 transfer (**Figure 5a**). In accord with our earlier findings, the antitumor activity of the wild-type  
236 CTLs was higher in the *Pcsk9*-depleted MC38 tumor than in the wild-type MC38 tumor (**Figure**  
237 **5b**). Conversely, when we transferred *Ldlr*<sup>-/-</sup> OT-I CTLs into the mice, there were no significant  
238 differences in tumor progression between the wild-type MC38 tumor and the *Pcsk9*-depleted MC38  
239 tumor (**Figure 5c**). These findings indicate that the PCSK9-derived inhibition of CD8<sup>+</sup> T cell's  
240 antitumor activity is through LDLR. Concurrently, we treated CD8<sup>+</sup> T cells with recombinant mouse  
241 PCSK9 protein. The results showed that the surface level of LDLR in CD8<sup>+</sup> T cells was reduced by  
242 PCSK9 treatment and consequently, the plasma membrane TCR level, CD3 phosphorylation, and  
243 the effector function were all down regulated (**Figure 5d-g**). Furthermore, we found that PCSK9  
244 treatment inhibited cytokine production of CD8<sup>+</sup> T cells when we pretreated CD8<sup>+</sup> T cells with  
245 recombinant mouse PCSK9. We then used the *in vitro* killing assay to assess the influence of PCSK9  
246 on CTL cytotoxicity, with PCSK9 over-expressing EL4 cells—which show normal MHC I (H2K<sup>b</sup>)  
247 expression—as the target cells. We found that the overexpression of PCSK9 substantially inhibited  
248 the killing efficiency of OT-I CD8<sup>+</sup> T cells (**Figure 5h**), findings which are consistent with the  
249 conclusion from LDLR deficient CD8<sup>+</sup> T cells.

250 To further evaluate the *in vivo* effects of PCSK9 on TCR, we transplanted wild-type and *Pcsk9*-  
251 depleted MC38-OVA cells to *Rag2*<sup>-/-</sup> mice, respectively. Then, we transferred OT-I CTLs to the  
252 tumor burdened mice. At day 7 post tumor inoculation, we isolated the tumor infiltrating CD8<sup>+</sup> T  
253 cells and performed flow cytometric analysis. The results showed that the TME inhibited the levels  
254 of surface TCR and the effector function but that PCSK9 depletion alleviated this inhibition (**Figure**  
255 **5i-k**), the . Collectively, these data demonstrated that the tumor derived PCSK9 may down regulate  
256 LDLR and TCR signaling and effector function of CD8<sup>+</sup> T cells, thus inhibiting the antitumor

257 activity of CD8<sup>+</sup> T cells in the TME.

## 258 **Inhibiting PCSK9 potentiates the antitumor activity of CD8<sup>+</sup> T cells**

259 Targeting the PCSK9/LDLR axis has shown clinical success in treating hypercholesterolemia and  
260 multiple drugs, such as evolocumab and alirocumab, have been approved for clinical use. Herein,  
261 we intensively investigated the PCSK9/LDLR axis in the CD8<sup>+</sup> T cell antitumor immune response.  
262 To evaluate whether targeting the PCSK9/LDLR axis possesses clinical cancer treatment potential,  
263 we used syngeneic mouse models to determine the antitumor effect of PCSK9 inhibitors. The  
264 blocking antibodies used, evolocumab and alirocumab, were humanized antibodies. Previous  
265 research has found that the binding affinity of evolocumab to mouse PCSK9 (K<sub>d</sub>=17 nM) is 1000-  
266 fold less than its binding affinity to human PCSK9 (K<sub>d</sub>=16 pM) (Brody and Brody, 2018). Similarly  
267 the binding affinity of alirocumab to mouse PCSK9 (K<sub>d</sub>=2.61 nM) is 4.5 fold less than the binding  
268 affinity to human PCSK9 (K<sub>d</sub>=0.58 nM). *In vitro* experiment also demonstrated that alirocumab is  
269 substantially less effective on mouse PCSK9 compared to human PCSK9. Therefore, we used a  
270 chemical inhibitor, PF0644684, which has been demonstrated previously to effectively inhibit  
271 PCSK9 expression through slowing down PCSK9 translation (Lintner et al., 2017).

272 First, we assessed the inhibitory effect of PF0644684 on tumor PCSK9 *in vivo* and found that 8  
273 administrations of a 2-10 mg/kg dose and effectively inhibited PCSK9 expression in MC38 tumors  
274 in C57BL/6 mice (**Supplementary figure 5a-b**). We then further evaluated the antitumor effect of  
275 PF0644684 in the syngeneic mouse tumor model, including MC38 and B16 tumors, where  
276 administration of PF0644684 effectively inhibited tumor progression (**Figure 6a-d**). In contrast,  
277 there was no analogous antitumor effect with PF0644686 administration in MC38 tumor burdened  
278 *Rag2*<sup>-/-</sup> mice, which lack CD8<sup>+</sup> T cells (**Figure 6e, f**). These findings were consistent with those of  
279 the *Pcsk9*<sup>-/-</sup> tumor cells. Furthermore, the *in vitro* CTL killing assay showed that EL4-OVA cells  
280 pretreated with PF0644684 increased the cytotoxicity of OT-I CTLs to the target cells  
281 (**Supplementary figure 5c**). Collectively, these findings indicate that PCSK9 inhibition potentiates  
282 the antitumor activity of CD8<sup>+</sup> T cells.

283 We then tested a combination therapy of PCSK9 inhibition and immune checkpoint blockade  
284 therapy to observe potential synergistic impacts. We treated MC38 tumor burdened C57BL/6 mice,  
285 which are immunocompetent syngeneic mice, with PF0644684 and anti-PD1 antibodies (**Figure 6g**,



286 **h).** The results showed that the combination therapy had a stronger tumor suppressive effect than  
287 either monotherapy, highlighting that PCSK9 inhibition has potential as a novel cancer  
288 immunotherapy strategy.

289

290



291 **DISCUSSION**

292 T cells undergo distinctive metabolic reprogramming in different stages, and these metabolic  
293 regulations have been demonstrated to play critical roles in T cells' immune responses (Ecker et al.,  
294 2018; Geltink et al., 2018; Chapman et al., 2020). As a main component of cellular metabolism,  
295 cholesterol metabolism is essential for effective T cell immune responses. But precisely how  
296 cholesterol metabolic pathways regulate CD8<sup>+</sup> T cell function and how metabolic reprogramming  
297 regulates CD8<sup>+</sup> T cell antitumor activity, needs more extensive and comprehensive investigation.  
298 Our previous study, and several related studies, have shown that the storage and biosynthetic  
299 pathways of cholesterol play an important role in the regulation of the CD8<sup>+</sup> T cell immune response  
300 (Bensinger et al., 2008; Yang et al., 2016; Ma et al., 2018; Ma et al., 2019). These studies support  
301 that CD8<sup>+</sup> T cells need free cholesterol to support effector function and clonal expansion. The tumor  
302 microenvironment has been demonstrated as a hypoxia, nutrient restricted environment (Zhang and  
303 Ertl, 2016). Can CD8<sup>+</sup> T cells obtain sufficient cholesterol in the tumor microenvironment to support  
304 their effector function and antitumor activity? And if so how? To answer these questions, we  
305 measured the cholesterol/LDL distribution in cancerous and paracancerous normal tissues in mice  
306 models and clinical sample from cancer patients. We found that APOB, which is a marker of LDL,  
307 showed higher levels in tumor regions compared with normal tissues. However, the cell cholesterol  
308 level of tumor infiltrating CD8<sup>+</sup> T cells were substantially lower than those of peripheral CD8<sup>+</sup> T  
309 cells, suggesting that the cholesterol metabolic pathways might be reprogramed. Further study  
310 confirmed this hypothesis, the cholesterol biosynthesis pathway and up take pathway by LDLR  
311 were found to be suppressed in the tumor microenvironment.

312 LDLR has been previously well characterized as a transporter of LDL, and LDLR deficiency has  
313 been identified as the cause of high serum LDL, hypercholesterolemia, and other related metabolic  
314 dysfunction diseases (Hobbs et al., 1990; Bayes-Genis et al., 2017; Da Dalt et al., 2019). The  
315 downregulation of LDLR might be a significant factor influencing the cellular cholesterol levels of  
316 tumor infiltrating CD8<sup>+</sup> T cells. Our *in vitro* and *in vivo* experiment demonstrated that LDLR is in  
317 fact necessary for CD8<sup>+</sup> T cell antitumor immunity. When we assessed the function of  
318 LDL/cholesterol in CD8<sup>+</sup> T cells, we found LDL/cholesterol is essential for CD8<sup>+</sup> T cell  
319 proliferation, but not effector function, particularly in activated cytotoxic CD8<sup>+</sup> T cells (CTLs).  
320 Moreover, we found that LDLR interacts with the T-cell receptor (TCR) on the plasma membrane

321 of CD8<sup>+</sup> T cells. This interaction favors TCR signaling and the effector function of CD8<sup>+</sup> T cells.  
322 LDLR deficiency appears to inhibit TCR recycling to the plasma membrane as well as TCR  
323 signaling. Taken together, we found a noncanonical function of LDLR, in which it functions as a  
324 membrane protein to regulate the other receptors on the plasma membrane, not just as a  
325 LDL/cholesterol transporter. This finding indicates that LDLR could regulated other membrane  
326 proteins and may be involved in more physiological functions in different cell types, highlighting it  
327 as a candidate for further study.

328 After elucidating the critical role of LDLR, the next question was how does the tumor  
329 microenvironment inhibit LDLR expression in CD8<sup>+</sup> T cells? Generally, protein expression can be  
330 inhibited at two levels: the transcriptional level and the protein level. In T cells, LDLR transcription  
331 is indirectly regulated by TCR/CD28 signaling. T cell activation by antigen stimulation can up  
332 regulate LDLR mRNA level (Yang et al., 2016). Moreover, T cell activation may downregulate  
333 IDOL, which is the E3 ligase of LDLR and mediates LDLR ubiquitination and degradation (Zelcer  
334 et al., 2009; Yang et al., 2016). In the past years, PCSK9, which has been shown to be a negative  
335 modulator of LDLR, has been utilized as a clinical drug target for treating hypercholesterolemia  
336 (Stein et al., 2013; Raal et al., 2015; Raal et al., 2017). We found that PCSK9 was highly expressed  
337 in the tumor region of CRC patients and that T cell infiltration was negatively correlated with the  
338 PCSK9 levels. Our findings suggest that tumor cell derived PCSK9 may downregulate the surface  
339 LDLR level in CD8<sup>+</sup> T cells, thereby inhibiting the antitumor activity of CD8<sup>+</sup> T cells. Given that  
340 the LDLR levels of CD8<sup>+</sup> T cells were downregulated during early stage infiltration (12-24hours,  
341 Figure 1B)—at which time the transcription of *Ldlr* was not altered—and in combination with the  
342 finding that LDLR may directly regulated TCR signaling—which is necessary for *Ldlr*  
343 transcription—we speculate that the tumor microenvironment derived PCSK9 may be the source of  
344 LDLR downregulation and consequently, the immune suppression of CD8<sup>+</sup> T cells. This speculation  
345 was confirmed in the *in vivo* syngeneic mouse tumor model, where the depletion of tumor PCSK9  
346 alleviated the immune suppression by the tumor microenvironment on CD8<sup>+</sup> T cells. Moreover,  
347 when we examined the intrinsic function of PCSK9 in CD8<sup>+</sup> T cells, we found that PCSK9  
348 intrinsically inhibited the effector function of CD8<sup>+</sup> T cells, with the PCSK9 knockout CD8<sup>+</sup>T cells  
349 exhibiting higher antitumor activities. Which, indicates that the simultaneous inhibition of PCSK9  
350 expression intumors and CD8<sup>+</sup> T cells maybe a therapeutic approach to potentiate CD8<sup>+</sup> T cell

351 antitumor immunity.

352 Targeting metabolic reprogramming has been demonstrated as a potential method for cancer  
353 immunotherapy (Dugnani et al., 2017; Kishton et al., 2017; Sukumar et al., 2017). To further assess  
354 the clinical potential of inhibiting PCSK9, we used a chemical inhibitor of PCSK9, PF0644684,  
355 which has proven to inhibit PCSK9 translation (Lintner et al., 2017). This inhibitor successfully  
356 demonstrated antitumor activity in a syngeneic mouse tumor model and when used in combination  
357 with anti-PD-1 antibodies, the antitumor effect was further enhanced. These findings further support  
358 that targeting the metabolic pathway of cholesterol is a potential method for cancer immunotherapy.

359 In summary, we have demonstrated that LDLR functions as a critical immune regulatory receptor  
360 for CD8<sup>+</sup> T cells in the tumor microenvironment. Furthermore, we report a novel mechanism for  
361 LDLR activity, whereby it interacts with TCR and regulates TCR signaling, ultimately impacting  
362 CD8<sup>+</sup> T cells effector function. Further investigation revealed that tumor derived PCSK9 is the  
363 critical factor for immune suppression of CD8<sup>+</sup> T cells by the tumor microenvironment. Collectively,  
364 our findings highlight that the PCSK9-LDLR axis is the metabolic immune checkpoint of the tumor  
365 microenvironment and that targeting this pathway holds great potential in cancer immunotherapy.

366

367

368



## 370 **Methods and materials**

### 371 **Patients and clinical specimens**

372 The paraffin embedded tissues of colorectal carcinoma (CRC) tissues, adjacent non-carcinoma  
373 tissues (ANT), lung cancer tissues and normal lung tissues were obtained from the tissue bank of  
374 the Department of Pathology, Nanfang Hospital, Southern Medical University. Samples were  
375 collected from colorectal cancer, lung cancer and breast cancer that had been clinically diagnosed  
376 as cancer. The study protocols concerning human subjects are consistent with the principles of the  
377 declaration of Helsinki. The study was approved by the Clinical Research Ethics Committee of  
378 Southern Medical University.

379

### 380 **Mice**

381 C57BL/6 mice, *Rag2*<sup>+/−</sup> mice, *Ldlr*<sup>−/−</sup> mice, *PCSK9*<sup>−/−</sup> mice and OT-I TCR transgenic mice were  
382 originally purchased from the Jackson Laboratory. Through mouse crossing, *Ldlr*<sup>−/−</sup> OT-I mice and  
383 *PCSK9*<sup>−/−</sup> OT-I mice were obtained and the genotypes were validated by using PCR. All mice used  
384 in this study are maintained in specific pathogen-free conditions. All animal experiments used mice  
385 were randomly allocated to specific groups with matched age and sex. All animal experiments were  
386 approved by the Ethics Committee on Use and Care of Animals of Southern Medical University.

387

### 388 **Reagents and antibodies**

389 For flow cytometric analysis, anti-CD3ε (145-2C11), anti-CD8 (53-6.7), anti-CD44 (IM7), anti-  
390 CD45 (30-F11), anti-IFNγ(XMG1.2), anti-granzyme B (NGZB), anti-TNF-α (MP6-XT22), anti-p-  
391 ZAP70/Syk(Tyr319, Tyr352) (n3kobu5), anti-p-BTK/ITK(Tyr551, Tyr511) (M4G3LN), anti-p-Akt  
392 (Ser473) (SDRNR) and anti-p-Erk (Thr202, Tyr204) (MILAN8R) were purchased from  
393 Thermofisher. Anti-mouse LDLR (101) was purchased from Sino Biological Inc. For western blot  
394 analysis, anti-β-actin, anti-GAPDH, anti-CD3ε, anti-CD3γ, anti-CD3ζ were from Santa Cruz  
395 Biotechnology. Anti-p-CD3ζ ( Tyr142 ) was from Abcam. Anti-HA was from Sigma. For  
396 immunohistochemistry analysis, anti-Apolipoprotein B (Abcam), anti-PCSK9 (Sino Biological) and  
397 anti-CD3 (SP7, Abcam) were purchased from indicated companies. For immunofluorescence and  
398 PLA staining, anti-LDLR was from Lifespan. Anti-CD3 was from Genetex. Anti-CD3 ε was from  
399 Bio X Cell. Filipin III was from Cayman. PF-06446846 was from MedChemExpress. For tissue  
400 infiltrated T cells isolation, Type IV Collagenase was from Gibco. DNase I was from Applichem.  
401 Hyaluronidase was from Sigma. Percoll was from GE. Anti-CD3ε(145-2C11, Bio X Cell), anti-  
402 human CD3(UCHT1, Bio X Cell) anti-mouse CD28(37.51, Bio X Cell) and anti-human CD28(9.3,  
403 Bio X Cell) were used for T cell activation. OVA<sub>257-264</sub> peptide (SIINFEKL) was from ChinaPeptides  
404 Co.. PCSK9 protein was purchased from ACROBiosystems. Celltrace CFSE, Celltracker Deep Red  
405 and Cell proliferation Dye eFluor 450 were from Invitrogen. Methyl-beta-cyclodextrin (MβCD) and  
406 MβCD-coated cholesterol were purchased from Sigma.

407

### 408 **Cell lines**

409 MC38 cells were provided by JENNIO Biological Technology (Guangzhou, China). B16F10 and  
410 EL-4 cells were originally obtained from the American Type Culture Collection (ATCC), and proved  
411 mycoplasma-free. MC38, B16F10 and 293T cells were maintained in DMEM (Gibco) and EL-4  
412 cells were in RPMI-1640 (Gibco) medium respectively, supplemented with 10% FBS and 1%  
413 penicillin-streptomycin. Cells were cultured at 37°C in a humidified atmosphere containing 95% air

414 and 5% CO<sub>2</sub>. MC38-OVA and B16F10-OVA cells were generated by lentivirus infection and  
415 mCherry<sup>+</sup> cells were sorted as OVA<sup>+</sup> cells.

416

#### 417 **PCSK9 knockdown and knockout cell lines**

418 To generate PCSK9 knockdown cell lines, lentiviruses were produced by transfecting 293T cells  
419 with pLKO.1-GFP, psPAX2 and VSV-G plasmids. MC38 cells were infected with pLKO.1 shRNA  
420 lentivirus and GFP<sup>+</sup> cells were selected by Fluorescence-activated Cell Sorting. Knockdown  
421 efficiency was determined by QPCR. ShRNA sequences against PCSK9 were as follows: sh*Pcsk9*  
422 #1: 5'-GCTGATCCACTTCTCTACC-3'; sh*Pcsk9* #2: 5'-CAGAGGCTACAGATTGAAC-3'.

423 To generate PCSK9 knockout cells, lentiviruses were produced by transfecting 293T cells with  
424 Lenti-CRISPR-V2, psPAX2 and VSV-G plasmids. MC38 and B16F10 cells were infected with  
425 lentivirus and GFP<sup>+</sup> cells were selected by Fluorescence-activated Cell Sorting. To generate PCSK9  
426 knockout single cell clones, the cells were digested, limited diluted and finally plated on 96-well  
427 plates at a concentration of 0.8 cell per well, which was confirmed visually. Wells containing either  
428 none or more than one cell were excluded for further analysis. The genotypes of single cell clones  
429 were identified by Sanger sequencing. SgRNA sequences targeting mouse PCSK9 were as follows:  
430 sg*Pcsk9* #1, 5'-GCTGATGAGGCCGCACATG-3'; sg*Pcsk9* #2, 5'-  
431 CTACTGTGCCCCACCGCGC-3'; sg*Pcsk9* #3, 5'-ACTTCAACAGCGTGCCGG-3', SgRNA  
432 sequence targeting LacZ: 5'-GCGAATACGCCACGCGAT-3'.

433

#### 434 **Flow cytometric analysis**

435 Anti-mouse CD16/32 antibody was used to block non-specific binding to Fc receptors before all  
436 surface staining. For surface staining, cells were collected and staining with antibodies at 4°C for  
437 30 min. For cytokine staining, cells were stimulated with Brefeldin A (3 µg/ml, invitrogen) for 4  
438 hours before cells were harvested for analysis. Before intracellular staining and phosphorylation  
439 staining, harvested cells were stained the surface protein and then fixed with 4% PFA for 5 minutes  
440 at RT. Then the cells were permeabilized with 0.1% Triton X-100 for 5 minutes at RT. Then the cells  
441 were stained with specific antibodies for 1 hour at 4°C. Flow cytometric data were analyzed with a  
442 SONY SA3800 flow cytometer and FlowJo software (Treestar).

443

#### 444 **Immunohistochemistry**

445 Human tissue samples and mouse tumor tissues were embedded with paraffin and sectioned  
446 longitudinally at 5 µm. All tissue sections were de-waxed and rehydrated and then antigens were  
447 retrieved with 10 mM sodium citrate (pH 6.0) in a pressure cooker. Incubated sections in 0.3% H<sub>2</sub>O<sub>2</sub>  
448 in methanal for 30 min for blocking endogenous peroxidase activity. The slides were blocked with  
449 goat serum and then processed for against human or mouse PCSK9, human ApoB and human CD3  
450 at 4°C overnight. Then the slides were incubated with a goat anti-HRP IgG antibody and developed  
451 with 3-amino-9-ethylcarbazole (ACE) and counterstained with hematoxylin. Images were captured  
452 by use of Zeiss microscope. Immunohistochemical results were scored in accordance with  
453 immunoreactive score (IRS) standards proposed by Remmele and Stegner. IRS = SI (staining  
454 intensity) × PP (percentage of positive cells). Negative PP, 0; 10% PP, 1; 10-50% PP, 2; 51-80% PP,  
455 3; and > 80% PP, 4. Negative SI, 0; Mild SI, 1; Moderate SI, 2; Strongly positive SI, 3. Images were  
456 scored independently by two pathologists who were blinded to patient information.

457

## 458 **Real time RT-PCR**

459 Total RNA was extracted with TRIzol reagent (ThermoFisher). cDNA was synthesized with the  
460 Hiscript III RT Supermix for qPCR Kit (Vazyme) according to the manufacturer's instructions. Real-  
461 time quantitative PCR using gene specific primers (5'-3'): *18s* (forward,  
462 TTGATTAAGTCCCTGCCCTTTGT; reverse, CGATCCGAGGGCCTCACTA); *Ldlr* (forward,  
463 TGAATCAGACGAACAAGGCTG, reverse, ATCTAGGCAATCTCGGTCTCC); *Srebp1* (forward,  
464 GCAGCCACCATCTAGCCTG; reverse, CAGCAGTGAGTCTGCCTTGAT); *Srebp2* (forward,  
465 GCAGCAACGGGACCATTCT; reverse, CCCCATGACTAAGTCCTTCAACT); *Acaca* (forward,  
466 ATGGGCGGAATGGTCTCTTTC; reverse, TGGGGACCTTGTCTTCATCAT); *Fasn* (forward,  
467 GGAGGTGGTGATAGCCGGTAT; reverse, TGGGTAATCCATAGAGCCCAG); *Hmgcs* (forward,  
468 AACTGGTGCAGAAATCTCTAGC; reverse, GGTTGAATAGCTCAGAACTAGCC); *Hmgcr*  
469 (forward, AGCTTGCCCGAATTGTATGTG; reverse, TCTGTTGTGAACCATGTGACTTC); *Sqle*  
470 (forward, ATAAGAAATGCGGGGATGTAC; reverse, ATATCCGAGAAGGCAGCGAAC);  
471 *Idol* (forward, TGCAGGCGTCTAGGGATCAT; reverse, GTTTAAGGCGGTAAGGTGCCA);  
472 *Abca1* (forward, AAAACCGCAGACATCCTTCAG; reverse, CATACCGAAACTCGTTCACCC);  
473 *Abcg1* (forward, CTTTCTACTCTGTACCCGAGG; reverse,  
474 CGGGGCATTCCATTGATAAGG); *Acat1* (forward, GAAACCGGCTGTCAAATCTGG;  
475 reverse, TGTGACCATTCTGTATGTGTCC); *Acat2* (forward,  
476 ACAAGACAGACCTCTTCCCTC; reverse, ATGGTTCGGAAATGTTTACC); *Nceh* (forward,  
477 TTGAATACAGGCTAGTCCCACA; reverse, CAACGTAGGTAAACTGTTGTCCC); *Ifng*  
478 (forward, ATGAACGCTACACACTGCATC; reverse, CCATCCTTTTGCCAGTTCCTC);  
479 *Pcsk9*(forward, GAGACCCAGAGGCTACAGATT; reverse, AATGTACTCCACATGGGGCAA).  
480 All PCR reactions were conducted on a QuantStudio real-time PCR system (Thermo Fisher) in  
481 triplicates. Gene expression was normalized to 18s.

482

## 483 **CD8<sup>+</sup> T cell isolation and activation**

484 Naïve CD8<sup>+</sup> T cells were isolated from mouse spleen by a EasySep Mouse Naïve CD8<sup>+</sup> T cell  
485 Isolation Kit (Stem Cell). Then the cells were stimulated with plate-coated anti-CD3 and anti-CD28  
486 at indicated concentration for indicated times.

487

## 488 **CTL generation**

489 OT-I mouse splenocytes were harvested and homogenized using sterile techniques. Red blood cells  
490 were then lysed with ACK buffer for 5 min at RT. The splenocytes were pelleted and resuspended  
491 at  $1 \times 10^6$  per millilitre in RPMI-1640 medium with 10% FBS, 1% penicillin-streptomycin, 2-  
492 mercaptoethanol and supplemented with 10 nM OVA<sub>257-264</sub> peptide and 10 ng/ml human  
493 recombinant interleukin-2 (Peprotech) for 3 days. Then the cells were cultured in fresh medium  
494 containing 10 ng/ml IL-2 for 2 more days to do the subsequent experiments.

495

## 496 **Measurement of CD8 T-cell proliferation**

497 Isolated naïve T cells were labeled with 0.4  $\mu$ M CFSE in PBS for 10 min at RT. Then the cells were  
498 washed with PBS for 3 times. The cells were stimulated with anti-CD3 and anti-CD28 (2  $\mu$ g/ml) for  
499 48 hours or 72 hours. The cells were collected and stained with anti-CD8. Then the CFSE  
500 fluorescence was detected by flow cytometry.

501



502 **Measurement of the cytotoxicity of CTL**

503 To measure the cytotoxicity of CTLs, EL-4 cells were pulsed with 10 nM OVA<sub>257-264</sub> for 30 min at  
504 37°C. Then the antigen-pulsed EL-4 cells were washed with PBS and then labeled with 1 µM  
505 CellTracker Deep Red (CTDR) in serum-free medium for 15 min at 37°C in dark. Meanwhile, EL-  
506 4 cells labeled with 0.5 µM CFSE in PBS for 10 min at RT in dark. After washing EL-4 cells with  
507 PBS for 3 times, CTDR labeled and CFSE labeled EL-4 cells were mixed at the ratio of 1:1 in the  
508 killing medium (RPMI 1640, 2% FBS). CTLs were added into the plate at the ratios of 0:1, 0.5:1,  
509 1:1, 2:1 and 5:1, respectively. After 4 hours, the cytotoxic efficiency was measured by quantifying  
510 the value of one minus the ratio of CTDR/CFSE ratio in cytotoxic group to non-cytotoxic group.

511

512 **Measurement of the immune synapse formation of CTL**

513 To measure the immune synapse formation between CTL and EL-4 cells, EL-4 cells were pulsed  
514 with 10 nM OVA<sub>257-264</sub> and labeled with CTDR. CTLs were labeled with CFSE. EL-4 cells and  
515 CTLs were mixed at the ratio of 1:1 and co-cultured for 30 min at 37°C. The cells were harvested  
516 for flow cytometric analysis and the percentage of CTDR and CFSE double positive cells were  
517 quantified.

518

519 **LDLR overexpression in CTL**

520 LDLR CDS or D225N mutant sequences were constructed into pMxs-EGFP plasmid. Retrovirus  
521 was generated by transfecting platE cells with pMxs-EGFP, pMxs-LDLR-EGFP or pMxs-LDLR  
522 D225N-EGFP plasmids. The supernatant containing the retrovirus was collected. To overexpress  
523 LDLR in CTL, OT-1 CTLs were generated and cultured for 1 day. Then the cells were spin-infected  
524 with the retrovirus for 2 hours at 2000 rpm with 10 ng/ml IL-2 and 10 µg/ml polybrene. Spin-  
525 infection was repeated at day 2. EGFP positive cells were isolated by Fluorescence-activated Cell  
526 Sorting and cultured in RPMI 1640 complete medium in the presence of 10 ng/ml IL-2.

527

528 **Mouse models for colorectal cancer and melanoma**

529 MC38, MC38-OVA or B16F10 cells were washed with PBS and filtered through a 40 µm strainer.  
530 Before tumor cells were inoculated, age and sex matched mice (6-8 weeks) were narcotized and  
531 shaved first, then  $1 \times 10^6$  MC38, MC38-OVA cells or  $4 \times 10^5$  B16F10 cells were subcutaneously  
532 injected into the dorsal part of mice. From day 6-10, tumors size was measured every 2 days, and  
533 animal survival rate was recorded every day. Tumor size was calculated as length  $\times$  width. Mice  
534 will be euthanized when the tumor size larger than  $225\text{mm}^2$  ( $15\text{mm} \times 15\text{mm}$ ) for ethical consideration.

535

536 **Adoptive T cell transfer**

537 MC38-OVA cells ( $1 \times 10^6$ ) were injected subcutaneously into *Rag2*<sup>-/-</sup> mice at age 6-8 weeks. On  
538 day 12-14, tumor-bearing mice with similar tumor size were randomly divided into specific groups  
539 and respectively received PBS, wild-type OT-I CTLs ( $1 \times 10^6$ ), *Ldlr*<sup>-/-</sup> OT-I CTLs ( $1 \times 10^6$ ) or  
540 *PCK9*<sup>-/-</sup> OT-I CTLs ( $1 \times 10^6$ ) intravenously injection. Tumor size was calculated as length  $\times$  width  
541 every 2 days and animal survival was measured every day from day 8. When the tumor size was  
542 larger than  $225\text{mm}^2$ , the mice were euthanized for ethical consideration.

543

544 **Depletion of CD8<sup>+</sup> T cells**

545 Mc38 cells ( $1 \times 10^6$ ) were inoculated subcutaneously into C57BL/6 mice at 6-8 weeks. Two days



546 before tumor inoculation, 200 µg/ml of α-CD8 depletion antibody (2.43, Bio X Cell) or rat IgG  
547 (2A3, Bio X Cell) were intraperitoneally injected into indicated group. Subsequently, α-CD8  
548 depletion antibody or rat IgG were injected for every 4 days.

549

### 550 **Treatment of cancer with PF-06446846, anti-PD-1 antibody or PF-06446846 plus anti-PD-1** 551 **antibody *in vivo***

552 Tumor-bearing mice with similar tumor size were randomly divided into different groups and  
553 received PBS, anti-PD-1 antibody (RMP1-14, Bio X Cell, 200 µg per injection), PF-06446846 (2  
554 mg/ml, 5 mg/ml or 10 mg/ml as indicated) or anti-PD-1 antibody plus PF-06446846 injection  
555 intraperitoneally every 2 days, respectively. PF-06446846 was injected 8 times from day 8 and anti-  
556 PD-1 was injected 6 times from day 9. The tumor size and survival were measured as mentioned  
557 above.

558

### 559 **Tumor infiltrating lymphocytes isolation and analysis**

560 CTL adoptively transferred *Rag2<sup>-/-</sup>* mice or tumor-bearing C57BL/6 mice were anesthetized and  
561 sacrificed, tumor tissues were dissected and cut into pieces and digested in RPMI 1640 medium  
562 containing collagenase VI (210 U/ml), DNase I (100 U/ml) and hyaluronidase (0.5 mg/ml) for 30  
563 min at 37°C. The dissociated cells were passed through a 70 µm strainer. The filtered cells were  
564 centrifuged at 50 g for 1 min. Then the supernatant was removed to a new tube to centrifuge at 1000  
565 g for 10 min. Resuspended cells for density gradient centrifugation with 40% Percoll and 70%  
566 Percoll. Harvested the interphase of gradient and spin at 1000 g for 5 min. The isolated tumor  
567 infiltrated lymphocytes were then to do the subsequent experiments. To measure the cytokine  
568 production of isolated TILs, the cells were stimulated with 50 ng/ml PMA, 1 µM ionomycin and 5  
569 µg/ml BFA for 4 hours at 37 °C.

570

### 571 **CD8<sup>+</sup> T cells selection**

572 Isolate CD8<sup>+</sup> T cells in tumor infiltrated lymphocytes was based on EasySep™ Release Mouse  
573 Biotin Positive Selection Kit (Stemcell). In brief, tumor infiltrated lymphocytes were resuspended  
574 in 500 µl ( $5 \times 10^7$ ), added biotin labeled anti-mouse CD8 (53-6.7) antibody and incubated for 15  
575 min at RT. Washed cells with isolation buffer and centrifuge for 5 min at 400 g. Added selection  
576 cocktail and incubated for 15 min at RT. Then RapidSpheres beads were added into incubation  
577 system for 10 min at RT under rolling and tilting. After incubating, add isolation buffer and  
578 magnetically select bead-bound CD8<sup>+</sup> T cells. Washed bead-bound CD8<sup>+</sup> T cells for 3 times and  
579 obtain pure bead-bound CD8<sup>+</sup> T cells.

580

### 581 **Filipin III staining**

582 Isolated tumor infiltrated T cells were washed with PBS for 3 times. Then load cells on the glass  
583 dish and incubate at RT for 10 min. Add 4% paraformaldehyde (PFA) and 0.05% glutaraldehyde to  
584 fix cells at RT for 10 minutes. Wash cells with PBS for 3 times and then stain Filipin III at the  
585 concentration of 50 ng/ml for 2 hours at RT. Cells were washed for 8 times and images were  
586 collected using Zeiss (LSM880, AxioObserver) confocal microscope and analyzed using Image J  
587 software.

588

### 589 **Modulation of the plasma membrane cholesterol level by MβCD and MβCD-coated**

590 **cholesterol.**

591 To deplete cholesterol from the plasma membrane, CD8<sup>+</sup> T cells were washed with PBS for two  
592 times and then incubated with 1 mM MβCD at 37 °C for 15 min. The cells were then washed three  
593 times with PBS.

594 To add cholesterol to the plasma membrane, CD8<sup>+</sup> T cells were washed with PBS for two times and  
595 then incubated with 10 μg/ml MβCD-coated cholesterol at 37 °C for 15 min. The cells were then  
596 washed three times with PBS.

597

598

599 **PCSK9 and PF-06446846 treatment**

600 Isolated naïve CD8<sup>+</sup> T cells from the spleen were stimulated with anti-CD3 and anti-CD28 in the  
601 presence of PCSK9 (5 μg/ml) for 24 hours and cytokine production were then determined.

602 EL4 and EL4-OVA cells were pretreated with PF-06446846 (5 μM or 10 μM) for 24 hours and then  
603 cocultured with CTLs for 12 hours. The cytotoxic efficiency was measured by flow cytometry.

604

605 **Immunofluorescence detection of co-localization and immune synapse**

606 CTLs were harvested and placed in glass bottom cell culture dish and fixed with 4% PFA. After  
607 blocking the non-specific binding sites with goat serum for 30 min at RT, the cells were incubated  
608 with anti-LDLR (Lifespan) and anti-CD3 (Genetex) primary antibodies for 12 hours at 4°C. Then  
609 the cells were stained with Alexa 488-conjugated goat anti-rabbit IgG and Alexa Fluor Plus 555-  
610 conjugated donkey anti-mouse IgG for 2 hours at 4°C after washing with PBS. Before imaging, the  
611 cells were sealed with In Situ Mounting Medium with DAPI (Sigma). Images were collected using  
612 Zessi (LSM880, AxioObserver) confocal microscope.

613 For immune synapse detection, LDLR-mEOS3.2 overexpressed CTLs and MC38-OVA were  
614 resuspended 4:1 with serum-free RPMI-1640 at 1 million per milliliter. Cells were centrifuged at  
615 200 rpm for 1 min, then incubated at 37°C for 15 min. Then cells were plated in glass bottom cell  
616 culture dish and allowed to settle down for 15 min before fixation with 4% PFA for 10 min. The  
617 cells were blocked with goat serum for 60 min at RT, stained with anti-CD3ε (Bio X Cell, 1ug/ml)  
618 primary antibody for 12 hours at 4°C. Excessive antibody was washed with PBS for three times.  
619 Then the cells were stained with Alexa 647-conjugated goat anti-hamster IgG secondary antibody  
620 for 60 min at RT. After washing with PBS, the cells were sealed with DAPI containing anti-fade  
621 reagent (Sigma). Images were collected with Nikon N-SIM system.

622

623 **Measurement the interaction of LDLR and CD3 by proximity ligation assay (PLA)**

624 PLA allows for endogenous detection of protein interaction. We detect the interaction of LDLR and  
625 CD3 according to Duolink PLA Fluorescence protocol (Sigma). Jurkat cells, activated Jurkat cells,  
626 CD8<sup>+</sup> T cells from wild type mice and *Ldlr*<sup>-/-</sup> mice were loaded on glass dish. Cells were fixed with  
627 4% PFA. Block non-specific signal by adding Duolink Blocking Solution and incubate for 60 min  
628 at 37°C. After blocking, add the anti-LDLR and anti-CD3 primary antibodies and incubated for 12h  
629 at 4°C. Then two PLA probes were diluted and added to the samples and incubated for 60 min at  
630 37°C. Prepare ligation and amplification buffer to ligate the fluorescence probe and amplify the  
631 signal. Mount the samples with In Situ Mounting Medium with DAPI (Sigma). The images were  
632 captured with Olympus FV1000 or Zess LSM880 confocal microscope, and analyzed with Image J  
633 software.

634 The TIRF-imaging was performed on Nikon N-SIM + N-STORM microscope with an TIRF 100 ×  
635 oil immersion lens. Adjusted the oblique incidence excitation to the appropriate TIRF angle to  
636 capture images.

637

### 638 **Co-immunoprecipitation and western blot analysis**

639 EL4 cells and CTLs were lysed in Nonidet P-40 lysis buffer (50 mM Tris-HCl, pH 7.4, 155 mM  
640 NaCl, 5 mM EDTA, 2 mM Na<sub>3</sub>VO<sub>4</sub>, 20 mM NaF, supplemented with complete protease inhibitor  
641 cocktail and phosphatase inhibitor cocktail), and target protein was immunoprecipitated with  
642 corresponding antibody and by Pierce™ Co-Immunoprecipitation Kit (Thermo Fisher) according to  
643 the manufacturer's instructions.

644 For western blotting analysis, proteins were separated by SDS-PAGE and transferred to  
645 polyvinylidene difluoride (PVDF) membrane. Proteins were then probed with specific primary antibodies  
646 followed by secondary antibodies conjugated with horseradish peroxidase (HRP).

647

### 648 **Statistics**

649 Statistical parameters are all shown in Figure Legends. Statistical analysis was performed using  
650 nonparametric two-tailed *t* test or two-way ANOVA in GraphPad Prism. The survival were analyzed  
651 by using Log-rank (Mantel-Cox) test. Unless specially described, error bars stand for standard error  
652 of the mean. \*,  $P < 0.05$ ; \*\*,  $P < 0.01$ ; \*\*\*,  $P < 0.001$ ; \*\*\*\*,  $P < 0.0001$ .

653

654

655

656

657 **Acknowledgements**

658 The imaging works were performed at the SMU Central Laboratory of Southern Medical University  
659 and Department of Pathology of Nanfang Hospital. We thank Chenqi Xu for the discussion at the  
660 early stage of this project. W.Y. is funded by National Key R&D Program of China (MOST, No.  
661 2018YFA0800404), NSFC grants (No. 81822036 and 31770931), Guangdong Natural Science  
662 Funds for Distinguished Young Scholar (No. 2017A030306030). J.Y. is funded by NSFC grants (No.  
663 82001658) , China Postdoctoral Science Foundation (No. BX20190148 and 2019M662973) and  
664 Guangdaong Basic and Applied Basic Research Foundation (No. 2019A1515110015). T.C. is  
665 funded by NSFC grants (No. 82001745), China Postdoctoral Science Foundation (No.  
666 2020M672544) and Guangdaong Basic and Applied Basic Research Foundation (No.  
667 2019A1515110052). X.Z. is funded by NSFC grants (No. 31800730) , China Postdoctoral Science  
668 Foundation (No. 2017M622730), Natural Science Foundation of Guangdong Province (No.  
669 2018030310293) and Guangdaong Basic and Applied Basic Research Foundation (No.  
670 2020A1515011246).

671

672 **Author contributions**

673 W.Y. conceived the project. W.Y., Y.D., H.Z., J.Y., T.C. and X.Z. designed the experiments; J.Y.,  
674 X.Z., H.L. and Q.C. performed the cellular experiments; T.C., J.Y., Z.C., H.C. and M.L. performed  
675 the animal experiments; X.Z., J.Y. and X.L. performed the biochemical and imaging experiment;  
676 Y.R., J.Q., S.F., and Y.W performed the IHC experiments and analyzed the clinical samples; Y.D.  
677 and H.Z. contributed to direct the project and discussions. All the authors contributed to data  
678 analysis, manuscript writing and revision.

679

680 **Competing Interests**

681 The authors declare no competing interests.

682

683 **References**

- 684 Abifadel, M., Varret, M., Rabès, J.P., Allard, D., Ouguerram, K., Devillers, M., Cruaud, C.,  
685 Benjannet, S., Wickham, L., Erlich, D., et al. (2003). Mutations in PCSK9 cause autosomal  
686 dominant hypercholesterolemia. *Nat Genet* 34, 154-156.
- 687 Alcover, A., Alarcón, B., and Di Bartolo, V. (2018). Cell Biology of T Cell Receptor Expression and  
688 Regulation. *Annu Rev Immunol* 36, 103-125.
- 689 Almeida, L., Lochner, M., Berod, L., and Sparwasser, T. (2016). Metabolic pathways in T cell  
690 activation and lineage differentiation. *Semin Immunol* 28, 514-524.
- 691 Baumann, T., Dunkel, A., Schmid, C., Schmitt, S., Hiltensperger, M., Lohr, K., Laketa, V.,  
692 Donakonda, S., Ahting, U., Lorenz-Depiereux, B., et al. (2020). Regulatory myeloid cells paralyze  
693 T cells through cell-cell transfer of the metabolite methylglyoxal. *Nat Immunol* 21, 555-566.
- 694 Bayes-Genis, A., Núñez, J., Zannad, F., Ferreira, J.P., Anker, S.D., Cleland, J.G., Dickstein, K.,  
695 Filippatos, G., Lang, C.C., Ng, L.L., et al. (2017). The PCSK9-LDL Receptor Axis and Outcomes  
696 in Heart Failure: BIOSTAT-CHF Subanalysis. *J Am Coll Cardiol* 70, 2128-2136.
- 697 Bensinger, S.J., Bradley, M.N., Joseph, S.B., Zelcer, N., Janssen, E.M., Hausner, M.A., Shih, R.,  
698 Parks, J.S., Edwards, P.A., Jamieson, B.D., et al. (2008). LXR signaling couples sterol metabolism  
699 to proliferation in the acquired immune response. *Cell* 134, 97-111.
- 700 Borst, J., Ahrends, T., Bąbała, N., Melief, C.J.M., and Kastenmüller, W. (2018). CD4(+) T cell help  
701 in cancer immunology and immunotherapy. *Nat Rev Immunol* 18, 635-647.
- 702 Brody, T., and Brody, T. (2018). FDA's drug review process and the package label : strategies for  
703 writing successful FDA submissions (London, United Kingdom ; San Diego, CA, United States,  
704 Academic Press).
- 705 Bunse, L., Pusch, S., Bunse, T., Sahm, F., Sanghvi, K., Friedrich, M., Alansary, D., Sonner, J.K.,  
706 Green, E., Deumelandt, K., et al. (2018). Suppression of antitumor T cell immunity by the  
707 oncometabolite (R)-2-hydroxyglutarate. *Nat Med* 24, 1192-1203.
- 708 Cascone, T., McKenzie, J.A., Mbofung, R.M., Punt, S., Wang, Z., Xu, C., Williams, L.J., Wang, Z.,  
709 Bristow, C.A., Carugo, A., et al. (2018). Increased Tumor Glycolysis Characterizes Immune  
710 Resistance to Adoptive T Cell Therapy. *Cell Metab* 27, 977-987.e974.
- 711 Chang, C.H., Qiu, J., O'Sullivan, D., Buck, M.D., Noguchi, T., Curtis, J.D., Chen, Q., Gindin, M.,  
712 Gubin, M.M., van der Windt, G.J., et al. (2015). Metabolic Competition in the Tumor  
713 Microenvironment Is a Driver of Cancer Progression. *Cell* 162, 1229-1241.
- 714 Chapman, N.M., Boothby, M.R., and Chi, H. (2020). Metabolic coordination of T cell quiescence  
715 and activation. *Nat Rev Immunol* 20, 55-70.
- 716 Cunningham, D., Danley, D.E., Geoghegan, K.F., Griffor, M.C., Hawkins, J.L., Subashi, T.A.,  
717 Varghese, A.H., Ammirati, M.J., Culp, J.S., Hoth, L.R., et al. (2007). Structural and biophysical  
718 studies of PCSK9 and its mutants linked to familial hypercholesterolemia. *Nat Struct Mol Biol* 14,  
719 413-419.
- 720 Da Dalt, L., Ruscica, M., Bonacina, F., Balzarotti, G., Dhyani, A., Di Cairano, E., Baragetti, A.,  
721 Arnaboldi, L., De Metrio, S., Pellegatta, F., et al. (2019). PCSK9 deficiency reduces insulin  
722 secretion and promotes glucose intolerance: the role of the low-density lipoprotein receptor. *Eur*  
723 *Heart J* 40, 357-368.
- 724 Draghiciu, O., Lubbers, J., Nijman, H.W., and Daemen, T. (2015). Myeloid derived suppressor cells-  
725 An overview of combat strategies to increase immunotherapy efficacy. *Oncoimmunology* 4,  
726 e954829.

- 727 Dugnani, E., Pasquale, V., Bordignon, C., Canu, A., Piemonti, L., and Monti, P. (2017). Integrating  
728 T cell metabolism in cancer immunotherapy. *Cancer Lett* 411, 12-18.
- 729 Ecker, C., Guo, L., Voicu, S., Gil-de-Gomez, L., Medvec, A., Cortina, L., Pajda, J., Andolina, M.,  
730 Torres-Castillo, M., Donato, J.L., et al. (2018). Differential Reliance on Lipid Metabolism as a  
731 Salvage Pathway Underlies Functional Differences of T Cell Subsets in Poor Nutrient Environments.  
732 *Cell Rep* 23, 741-755.
- 733 Garcia, C.K., Wilund, K., Arca, M., Zuliani, G., Fellin, R., Maioli, M., Calandra, S., Bertolini, S.,  
734 Cossu, F., Grishin, N., et al. (2001). Autosomal recessive hypercholesterolemia caused by mutations  
735 in a putative LDL receptor adaptor protein. *Science* 292, 1394-1398.
- 736 Gaus, K., Chklovskaya, E., Fazekas de St Groth, B., Jessup, W., and Harder, T. (2005). Condensation  
737 of the plasma membrane at the site of T lymphocyte activation. *J Cell Biol* 171, 121-131.
- 738 Geltink, R.I.K., Kyle, R.L., and Pearce, E.L. (2018). Unraveling the Complex Interplay Between T  
739 Cell Metabolism and Function. *Annu Rev Immunol* 36, 461-488.
- 740 Gent, J., and Braakman, I. (2004). Low-density lipoprotein receptor structure and folding. *Cell Mol*  
741 *Life Sci* 61, 2461-2470.
- 742 Go, G.W., and Mani, A. (2012). Low-density lipoprotein receptor (LDLR) family orchestrates  
743 cholesterol homeostasis. *Yale J Biol Med* 85, 19-28.
- 744 Gourdin, N., Bossennec, M., Rodriguez, C., Vigano, S., Machon, C., Jandus, C., Bauché, D., Faget,  
745 J., Durand, I., Chopin, N., et al. (2018). Autocrine Adenosine Regulates Tumor Polyfunctional  
746 CD73(+)CD4(+) Effector T Cells Devoid of Immune Checkpoints. *Cancer Res* 78, 3604-3618.
- 747 Ho, P.C., Bihuniak, J.D., Macintyre, A.N., Staron, M., Liu, X., Amezcua, R., Tsui, Y.C., Cui, G.,  
748 Micevic, G., Perales, J.C., et al. (2015). Phosphoenolpyruvate Is a Metabolic Checkpoint of Anti-  
749 tumor T Cell Responses. *Cell* 162, 1217-1228.
- 750 Hobbs, H.H., Russell, D.W., Brown, M.S., and Goldstein, J.L. (1990). The LDL receptor locus in  
751 familial hypercholesterolemia: mutational analysis of a membrane protein. *Annu Rev Genet* 24,  
752 133-170.
- 753 Jeon, H., and Blacklow, S.C. (2005). Structure and physiologic function of the low-density  
754 lipoprotein receptor. *Annu Rev Biochem* 74, 535-562.
- 755 Kalluri, R. (2016). The biology and function of fibroblasts in cancer. *Nat Rev Cancer* 16, 582-598.
- 756 Kidani, Y., Elsaesser, H., Hock, M.B., Vergnes, L., Williams, K.J., Argus, J.P., Marbois, B.N.,  
757 Komisopoulou, E., Wilson, E.B., Osborne, T.F., et al. (2013). Sterol regulatory element-binding  
758 proteins are essential for the metabolic programming of effector T cells and adaptive immunity. *Nat*  
759 *Immunol* 14, 489-499.
- 760 Kishton, R.J., Sukumar, M., and Restifo, N.P. (2017). Metabolic Regulation of T Cell Longevity  
761 and Function in Tumor Immunotherapy. *Cell Metab* 26, 94-109.
- 762 Kumar, V., Donthireddy, L., Marvel, D., Condamine, T., Wang, F., Lavilla-Alonso, S., Hashimoto,  
763 A., Vonteddu, P., Behera, R., Goins, M.A., et al. (2017). Cancer-Associated Fibroblasts Neutralize  
764 the Anti-tumor Effect of CSF1 Receptor Blockade by Inducing PMN-MDSC Infiltration of Tumors.  
765 *Cancer Cell* 32, 654-668.e655.
- 766 Kwon, H.J., Lagace, T.A., McNutt, M.C., Horton, J.D., and Deisenhofer, J. (2008). Molecular basis  
767 for LDL receptor recognition by PCSK9. *Proc Natl Acad Sci U S A* 105, 1820-1825.
- 768 Leach, D.R., Krummel, M.F., and Allison, J.P. (1996). Enhancement of antitumor immunity by  
769 CTLA-4 blockade. *Science* 271, 1734-1736.
- 770 Leone, R.D., Zhao, L., Englert, J.M., Sun, I.M., Oh, M.H., Sun, I.H., Arwood, M.L., Bettencourt,



771 I.A., Patel, C.H., Wen, J., et al. (2019). Glutamine blockade induces divergent metabolic programs  
772 to overcome tumor immune evasion. *Science* 366, 1013-1021.

773 Lintner, N.G., McClure, K.F., Petersen, D., Londregan, A.T., Piotrowski, D.W., Wei, L., Xiao, J.,  
774 Bolt, M., Loria, P.M., Maguire, B., et al. (2017). Selective stalling of human translation through  
775 small-molecule engagement of the ribosome nascent chain. *PLoS Biol* 15, e2001882.

776 Liu, X., Bao, X., Hu, M., Chang, H., Jiao, M., Cheng, J., Xie, L., Huang, Q., Li, F., and Li, C.Y.  
777 (2020). Inhibition of PCSK9 potentiates immune checkpoint therapy for cancer. *Nature*.

778 Ma, L., Wang, L., Nelson, A.T., Han, C., He, S., Henn, M.A., Menon, K., Chen, J.J., Baek, A.E.,  
779 Vardanyan, A., et al. (2020). 27-Hydroxycholesterol acts on myeloid immune cells to induce T cell  
780 dysfunction, promoting breast cancer progression. *Cancer Lett* 493, 266-283.

781 Ma, X., Bi, E., Huang, C., Lu, Y., Xue, G., Guo, X., Wang, A., Yang, M., Qian, J., Dong, C., et al.  
782 (2018). Cholesterol negatively regulates IL-9-producing CD8(+) T cell differentiation and antitumor  
783 activity. *J Exp Med* 215, 1555-1569.

784 Ma, X., Bi, E., Lu, Y., Su, P., Huang, C., Liu, L., Wang, Q., Yang, M., Kalady, M.F., Qian, J., et al.  
785 (2019). Cholesterol Induces CD8(+) T Cell Exhaustion in the Tumor Microenvironment. *Cell Metab*  
786 30, 143-156 e145.

787 Mantovani, A., Marchesi, F., Malesci, A., Laghi, L., and Allavena, P. (2017). Tumour-associated  
788 macrophages as treatment targets in oncology. *Nat Rev Clin Oncol* 14, 399-416.

789 Maude, S.L., Frey, N., Shaw, P.A., Aplenc, R., Barrett, D.M., Bunin, N.J., Chew, A., Gonzalez, V.E.,  
790 Zheng, Z., Lacey, S.F., et al. (2014). Chimeric antigen receptor T cells for sustained remissions in  
791 leukemia. *N Engl J Med* 371, 1507-1517.

792 Maus, M.V., Haas, A.R., Beatty, G.L., Albelda, S.M., Levine, B.L., Liu, X., Zhao, Y., Kalos, M.,  
793 and June, C.H. (2013). T cells expressing chimeric antigen receptors can cause anaphylaxis in  
794 humans. *Cancer Immunol Res* 1, 26-31.

795 Maxwell, K.N., Fisher, E.A., and Breslow, J.L. (2005). Overexpression of PCSK9 accelerates the  
796 degradation of the LDLR in a post-endoplasmic reticulum compartment. *Proc Natl Acad Sci U S A*  
797 102, 2069-2074.

798 Morgan, R.A., Dudley, M.E., Wunderlich, J.R., Hughes, M.S., Yang, J.C., Sherry, R.M., Royal, R.E.,  
799 Topalian, S.L., Kammula, U.S., Restifo, N.P., et al. (2006). Cancer regression in patients after  
800 transfer of genetically engineered lymphocytes. *Science* 314, 126-129.

801 Neelapu, S.S., Tummala, S., Kebriaei, P., Wierda, W., Locke, F.L., Lin, Y., Jain, N., Daver, N.,  
802 Gulbis, A.M., Adkins, S., et al. (2018). Toxicity management after chimeric antigen receptor T cell  
803 therapy: one size does not fit 'ALL'. *Nat Rev Clin Oncol* 15, 218.

804 Newton, R.H., Shrestha, S., Sullivan, J.M., Yates, K.B., Compeer, E.B., Ron-Harel, N., Blazar, B.R.,  
805 Bensinger, S.J., Haining, W.N., Dustin, M.L., et al. (2018). Maintenance of CD4 T cell fitness  
806 through regulation of Foxo1. *Nat Immunol* 19, 838-848.

807 Patel, C.H., and Powell, J.D. (2017). Targeting T cell metabolism to regulate T cell activation,  
808 differentiation and function in disease. *Curr Opin Immunol* 46, 82-88.

809 Patsoukis, N., Bardhan, K., Chatterjee, P., Sari, D., Liu, B., Bell, L.N., Karoly, E.D., Freeman, G.J.,  
810 Petkova, V., Seth, P., et al. (2015). PD-1 alters T-cell metabolic reprogramming by inhibiting  
811 glycolysis and promoting lipolysis and fatty acid oxidation. *Nat Commun* 6, 6692.

812 Poirier, S., Mayer, G., Benjannet, S., Bergeron, E., Marcinkiewicz, J., Nassoury, N., Mayer, H.,  
813 Nimpf, J., Prat, A., and Seidah, N.G. (2008). The proprotein convertase PCSK9 induces the  
814 degradation of low density lipoprotein receptor (LDLR) and its closest family members VLDLR

815 and ApoER2. *J Biol Chem* 283, 2363-2372.

816 Proto, J.D., Doran, A.C., Subramanian, M., Wang, H., Zhang, M., Sozen, E., Rymond, C.C.,  
817 Kuriakose, G., D'Agati, V., Winchester, R., et al. (2018). Hypercholesterolemia induces T cell  
818 expansion in humanized immune mice. *J Clin Invest* 128, 2370-2375.

819 Raal, F.J., Honarpour, N., Blom, D.J., Hovingh, G.K., Xu, F., Scott, R., Wasserman, S.M., and Stein,  
820 E.A. (2015). Inhibition of PCSK9 with evolocumab in homozygous familial hypercholesterolaemia  
821 (TESLA Part B): a randomised, double-blind, placebo-controlled trial. *Lancet* 385, 341-350.

822 Raal, F.J., Hovingh, G.K., Blom, D., Santos, R.D., Harada-Shiba, M., Bruckert, E., Couture, P.,  
823 Soran, H., Watts, G.F., Kurtz, C., et al. (2017). Long-term treatment with evolocumab added to  
824 conventional drug therapy, with or without apheresis, in patients with homozygous familial  
825 hypercholesterolaemia: an interim subset analysis of the open-label TAUSSIG study. *Lancet*  
826 *Diabetes Endocrinol* 5, 280-290.

827 Rafiq, S., Hackett, C.S., and Brentjens, R.J. (2020). Engineering strategies to overcome the current  
828 roadblocks in CAR T cell therapy. *Nat Rev Clin Oncol* 17, 147-167.

829 Rizvi, N.A., Hellmann, M.D., Snyder, A., Kvistborg, P., Makarov, V., Havel, J.J., Lee, W., Yuan, J.,  
830 Wong, P., Ho, T.S., et al. (2015). Cancer immunology. Mutational landscape determines sensitivity  
831 to PD-1 blockade in non-small cell lung cancer. *Science* 348, 124-128.

832 Rudenko, G., Henry, L., Henderson, K., Ichtchenko, K., Brown, M.S., Goldstein, J.L., and  
833 Deisenhofer, J. (2002). Structure of the LDL receptor extracellular domain at endosomal pH.  
834 *Science* 298, 2353-2358.

835 Semenza, G.L. (2016). The hypoxic tumor microenvironment: A driving force for breast cancer  
836 progression. *Biochim Biophys Acta* 1863, 382-391.

837 Shi, X., Bi, Y., Yang, W., Guo, X., Jiang, Y., Wan, C., Li, L., Bai, Y., Guo, J., Wang, Y., et al. (2013).  
838 Ca<sup>2+</sup> regulates T-cell receptor activation by modulating the charge property of lipids. *Nature* 493,  
839 111-115.

840 Stanford, S.M., Rapini, N., and Bottini, N. (2012). Regulation of TCR signalling by tyrosine  
841 phosphatases: from immune homeostasis to autoimmunity. *Immunology* 137, 1-19.

842 Stein, E.A., Honarpour, N., Wasserman, S.M., Xu, F., Scott, R., and Raal, F.J. (2013). Effect of the  
843 proprotein convertase subtilisin/kexin 9 monoclonal antibody, AMG 145, in homozygous familial  
844 hypercholesterolemia. *Circulation* 128, 2113-2120.

845 Sukumar, M., Kishton, R.J., and Restifo, N.P. (2017). Metabolic reprogramming of anti-tumor  
846 immunity. *Curr Opin Immunol* 46, 14-22.

847 Sukumar, M., Liu, J., Ji, Y., Subramanian, M., Crompton, J.G., Yu, Z., Roychoudhuri, R., Palmer,  
848 D.C., Muranski, P., Karoly, E.D., et al. (2013). Inhibiting glycolytic metabolism enhances CD8+ T  
849 cell memory and antitumor function. *J Clin Invest* 123, 4479-4488.

850 Togashi, Y., Shitara, K., and Nishikawa, H. (2019). Regulatory T cells in cancer immunosuppression  
851 - implications for anticancer therapy. *Nat Rev Clin Oncol* 16, 356-371.

852 Trickett, A., and Kwan, Y.L. (2003). T cell stimulation and expansion using anti-CD3/CD28 beads.  
853 *J Immunol Methods* 275, 251-255.

854 van der Merwe, P.A., and Dushek, O. (2011). Mechanisms for T cell receptor triggering. *Nat Rev*  
855 *Immunol* 11, 47-55.

856 Wang, F., Beck-García, K., Zorzín, C., Schamel, W.W., and Davis, M.M. (2016). Inhibition of T cell  
857 receptor signaling by cholesterol sulfate, a naturally occurring derivative of membrane cholesterol.  
858 *Nat Immunol* 17, 844-850.



859 Wang, W., and Zou, W. (2020). Amino Acids and Their Transporters in T Cell Immunity and Cancer  
860 Therapy. *Mol Cell* 80, 384-395.

861 Wolchok, J.D., Kluger, H., Callahan, M.K., Postow, M.A., Rizvi, N.A., Lesokhin, A.M., Segal, N.H.,  
862 Ariyan, C.E., Gordon, R.A., Reed, K., et al. (2013). Nivolumab plus ipilimumab in advanced  
863 melanoma. *N Engl J Med* 369, 122-133.

864 Wu, W., Shi, X., and Xu, C. (2016). Regulation of T cell signalling by membrane lipids. *Nat Rev*  
865 *Immunol* 16, 690-701.

866 Yang, W., Bai, Y., Xiong, Y., Zhang, J., Chen, S., Zheng, X., Meng, X., Li, L., Wang, J., Xu, C., et  
867 al. (2016). Potentiating the antitumour response of CD8(+) T cells by modulating cholesterol  
868 metabolism. *Nature* 531, 651-655.

869 Zech, T., Ejsing, C.S., Gaus, K., de Wet, B., Shevchenko, A., Simons, K., and Harder, T. (2009).  
870 Accumulation of raft lipids in T-cell plasma membrane domains engaged in TCR signalling. *The*  
871 *EMBO journal* 28, 466-476.

872 Zelcer, N., Hong, C., Boyadjian, R., and Tontonoz, P. (2009). LXR regulates cholesterol uptake  
873 through Idol-dependent ubiquitination of the LDL receptor. *Science* 325, 100-104.

874 Zhang, D.W., Lagace, T.A., Garuti, R., Zhao, Z., McDonald, M., Horton, J.D., Cohen, J.C., and  
875 Hobbs, H.H. (2007). Binding of proprotein convertase subtilisin/kexin type 9 to epidermal growth  
876 factor-like repeat A of low density lipoprotein receptor decreases receptor recycling and increases  
877 degradation. *J Biol Chem* 282, 18602-18612.

878 Zhang, Y., and Ertl, H.C. (2016). Starved and Asphyxiated: How Can CD8(+) T Cells within a  
879 Tumor Microenvironment Prevent Tumor Progression. *Front Immunol* 7, 32.

880 Zhang, Y., Kurupati, R., Liu, L., Zhou, X.Y., Zhang, G., Hudaihed, A., Filisio, F., Giles-Davis, W.,  
881 Xu, X., Karakousis, G.C., et al. (2017). Enhancing CD8(+) T Cell Fatty Acid Catabolism within a  
882 Metabolically Challenging Tumor Microenvironment Increases the Efficacy of Melanoma  
883 Immunotherapy. *Cancer Cell* 32, 377-391 e379.

884

885

886 **Main Figures**

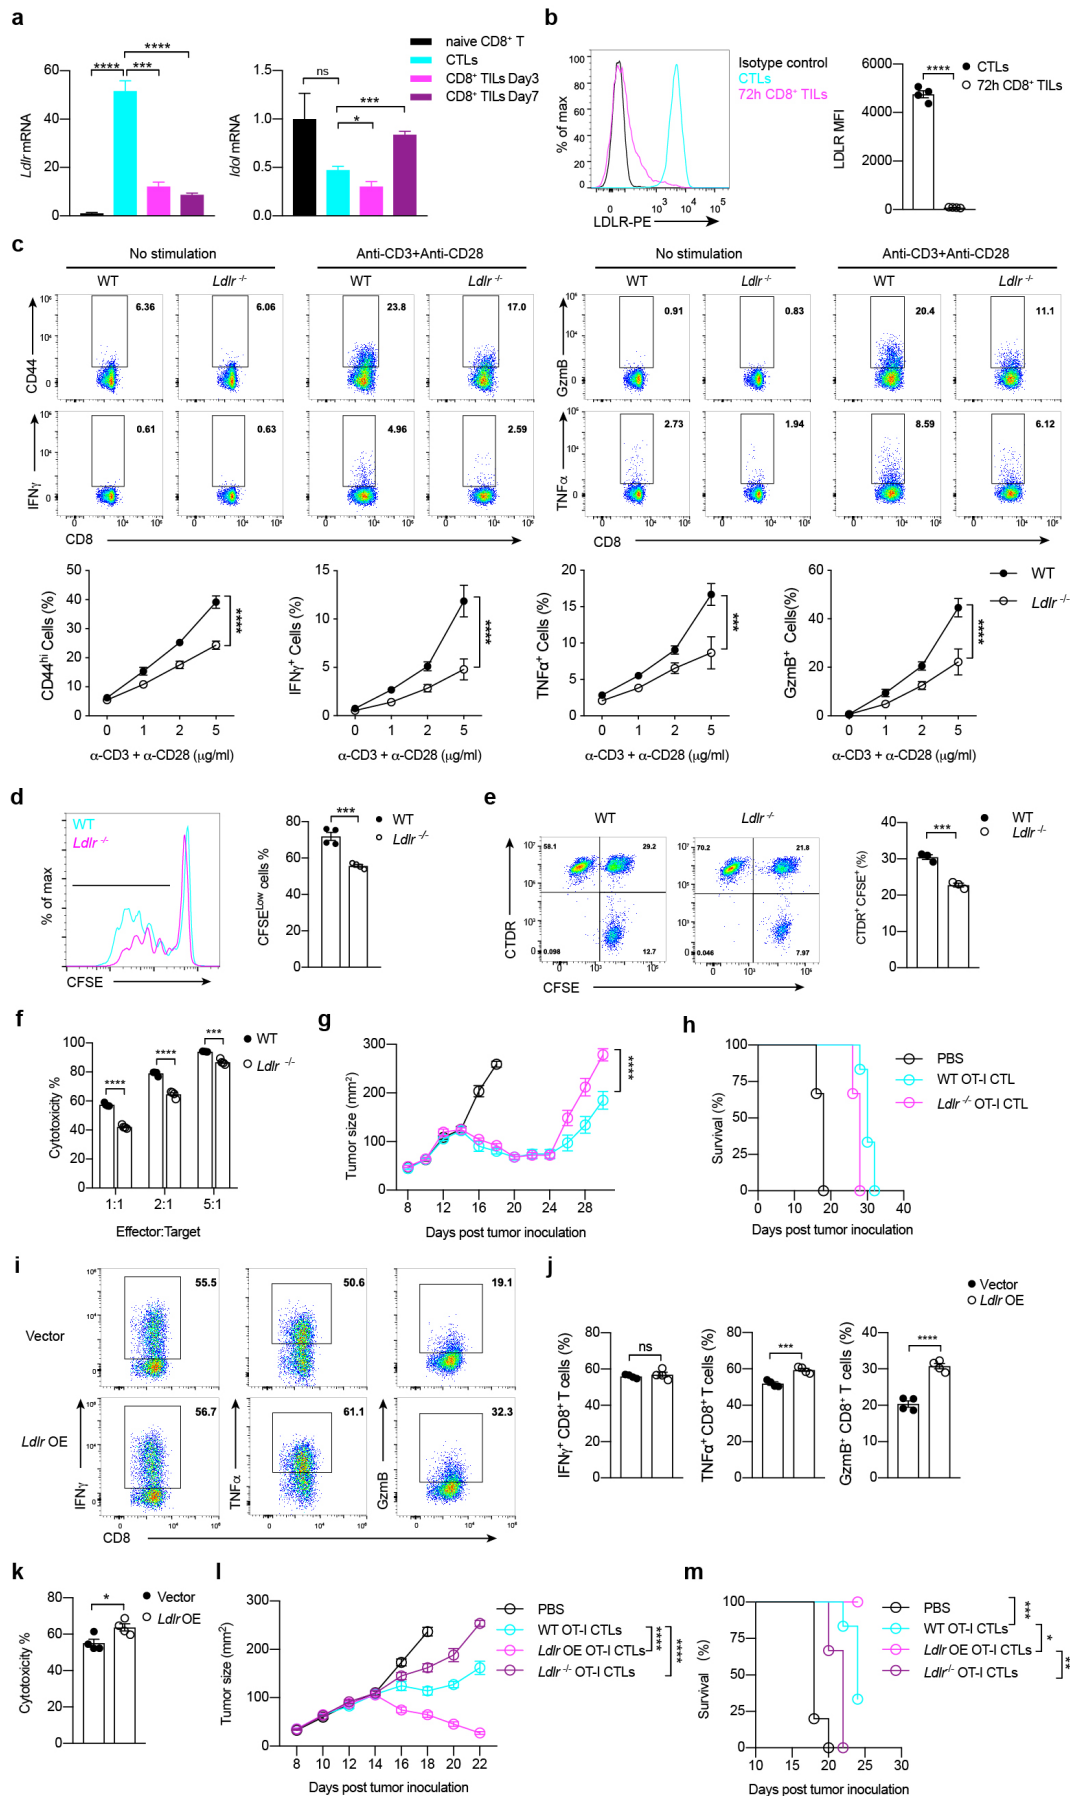

888 **Figure 1. LDLR deficiency hinders the antitumor activity of CD8<sup>+</sup> T cells.**

889 **a**, Transcriptional level of cholesterol transport genes *Ldlr* and *Idol* in naïve CD8 T cells, CTL and CD8<sup>+</sup>  
890 TILs (isolated at Day3 or Day7 post adoptive transfer), (n = 4). **b**, LDLR expression levels on CTLs and  
891 CD8<sup>+</sup> TILs (isolated at 72 hours post adoptive transfer), (n = 4). **c**, T cell activation and cytokine/granule  
892 productions of WT and *Ldlr*<sup>-/-</sup> CD8<sup>+</sup> T cells. Naïve CD8<sup>+</sup> T cells were isolated from the spleen and  
893 stimulated with anti-CD3 and anti-CD28 antibodies for 24 hours at indicated concentrations. Data were  
894 analyzed by two-way ANOVA (n = 4). **d**. CD8<sup>+</sup> T cell proliferation was measured by CFSE dilution  
895 assay. CD8<sup>+</sup> T cells were isolated from the spleen and stimulated with 1µg/ml plate-coated anti-CD3 and  
896 anti-CD28 antibodies for 72h (n = 4). **e**, Immunological synapse formation of WT and *Ldlr*<sup>-/-</sup> CTLs.  
897 CFSE-labeled CTLs and CellTracker Deep Red (CTDR)-labeled OVA-pulsed EL4 cells were cocultured  
898 for 30 mins (n = 3). **f**, Cytotoxicity of WT and *Ldlr*<sup>-/-</sup> CTLs. Splenocytes from WT and *Ldlr*<sup>-/-</sup> OT-I mice  
899 were stimulated with OVA<sub>257-264</sub> and IL-2 to generate mature CTLs. CTLs were incubated with OVA-  
900 pulsed CTDR-labeled EL-4 cells and CFSE-labeled non-pulsed EL-4 cells for 4 hours. The ratio of OVA-  
901 pulsed and non-pulsed EL4 cells was calculated to determine the cytotoxicity of CTLs (n = 4). **g-h**,  
902 Tumor growth (**g**) and survival (**h**) of MC38-OVA tumor-bearing *Rag2*<sup>-/-</sup> mice after adoptive transfer of  
903 PBS, WT or *Ldlr*<sup>-/-</sup> CTLs. Data were analyzed by two-way ANOVA (n = 6). **i-j**, Cytokine and granule  
904 productions of control and *Ldlr* OE CTLs. *Ldlr* was overexpressed in CTLs with retrovirus infection.  
905 The sorted cells were stimulated with 1µg/ml plate-coated anti-CD3 and anti-CD28 for 4 hours (n = 4).  
906 **k**, Cytotoxicity of control and *Ldlr* OE CTLs. CTLs were incubated with OVA-pulsed EL-4 cells and  
907 non-pulsed EL-4 cells for 4 hours (n = 4). **l-m**, Tumor growth (**l**) and survival (**m**) of MC38-OVA tumor-  
908 bearing *Rag2*<sup>-/-</sup> mice after adoptive transfer of PBS, WT, *Ldlr* OE or *Ldlr*<sup>-/-</sup> CTLs. Data were analyzed  
909 by two-way ANOVA (n = 5-6). \*, *P* < 0.05; \*\*, *P* < 0.01; \*\*\*, *P* < 0.001 \*\*\*\*, *P* < 0.0001. Error bars  
910 denote for the s.e.m.

911

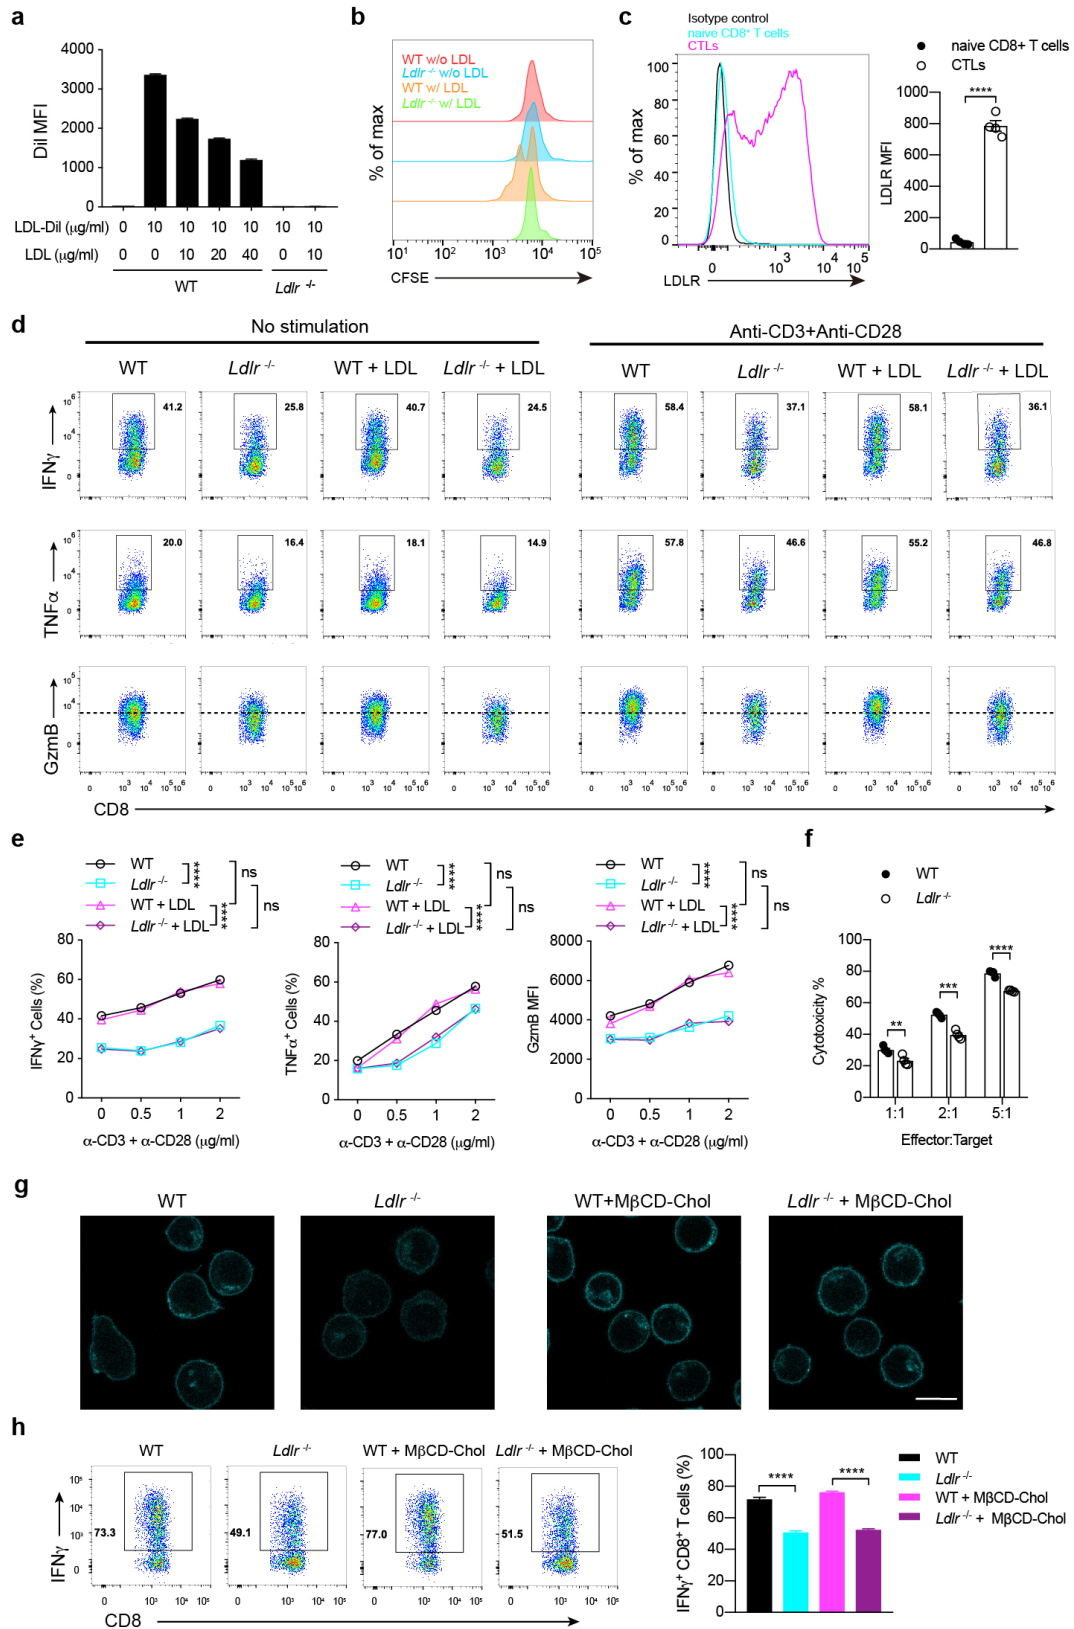

912

913 **Figure 2. The regulation of LDLR on CD8<sup>+</sup> T cell effector function is not fully dependent**  
 914 **on LDL/cholesterol.**

915 **a**, LDL uptake of activated WT and *Ldlr*<sup>-/-</sup> CD8<sup>+</sup> T cells. CD8<sup>+</sup> T cells were treated with LDL and LDL-  
 916 Dil at indicated concentrations. The uptake of LDL-Dil was analyzed by flow cytometry. **b**, Proliferation

917 of WT and *Ldlr*<sup>-/-</sup> CD8<sup>+</sup> T cells was measured by CFSE dilution, with or without the presence of LDL. **c**,  
918 LDLR expression was analyzed by flow cytometry of naïve CD8<sup>+</sup> T cells and CTLs. Data were analyzed  
919 by *t* test (n = 4). **d, e**, Cytokine/granule productions of WT and *Ldlr*<sup>-/-</sup> CTLs. CTLs were generated from  
920 the splenocytes of WT and *Ldlr*<sup>-/-</sup> mouse and pretreated in LPDS medium for 2 hours, with or without  
921 the presence of LDL. The cells were then stimulated with anti-CD3 and anti-CD28 antibodies for 4 hours  
922 at indicated concentrations in corresponding medium. Data were analyzed by two-way ANOVA (n = 4).  
923 **f**, Cytotoxicity of WT and *Ldlr*<sup>-/-</sup> CTLs. CTLs were pretreated with LPDS medium for 12 hours and  
924 cocultured with EL4 cells to determine the cytotoxicity. Data were analyzed by *t* test (n = 4). **g**, Filipin  
925 III staining to analyse cellular cholesterol distribution in untreated or MβCD-coated cholesterol treated  
926 WT and *Ldlr*<sup>-/-</sup> CTLs. Scale bar, 10μm. **h**, IFNγ production of WT and *Ldlr*<sup>-/-</sup> CTLs. Mature CTLs were  
927 generated from the splenocytes of WT and *Ldlr*<sup>-/-</sup> mice and treated with MβCD-coated cholesterol or not.  
928 The cells were then stimulated with 1μg/ml plate-coated anti-CD3 and anti-CD28 antibodies for 4 hours.  
929 Data were analyzed by *t* test (n = 4). ns, no significance; \*\*, *P* < 0.01; \*\*\*, *P* < 0.001; \*\*\*\*, *P* < 0.0001.  
930 Error bars denote for the s.e.m.  
931

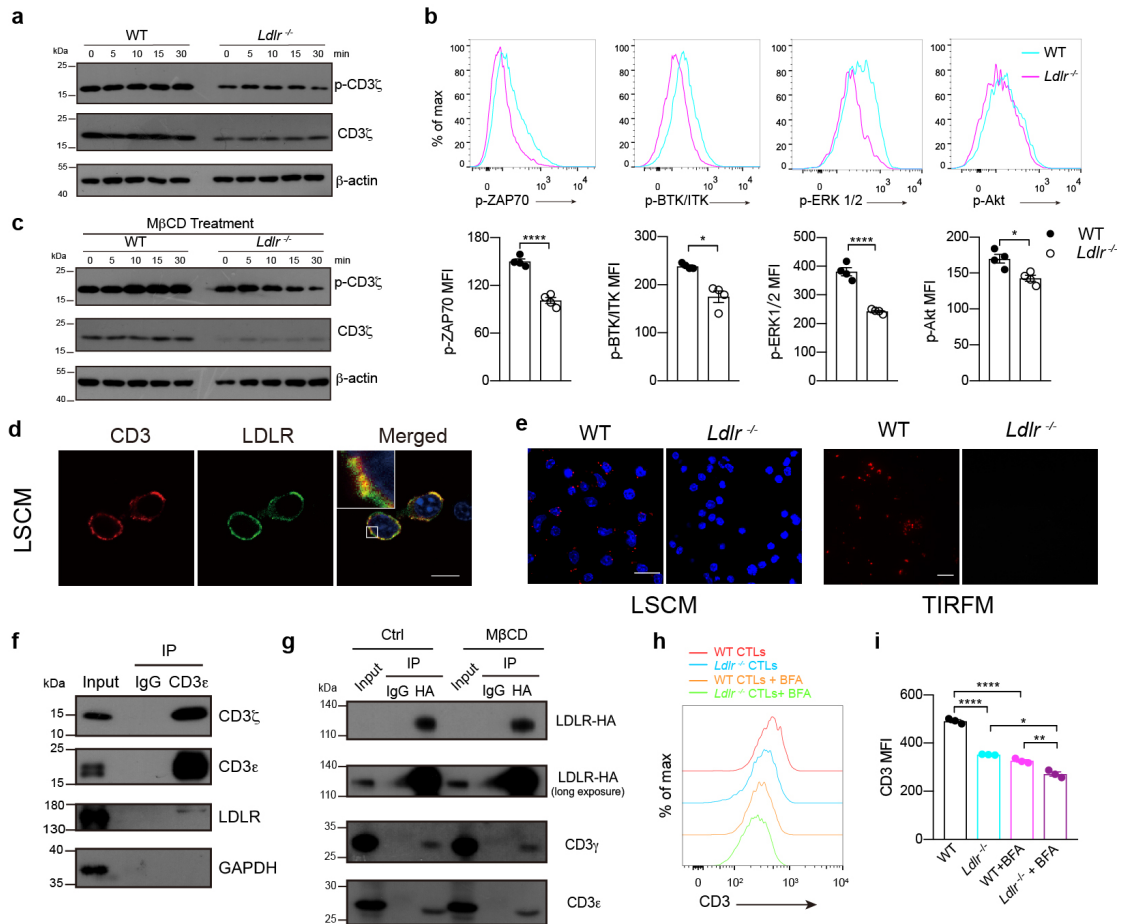

932

933 **Figure 3. LDLR binds to TCR and regulate TCR signaling in CD8<sup>+</sup> T cells**

934 **a**, Immunoblotting to detect the phosphorylation of CD3  $\zeta$  of WT and *Ldlr*<sup>-/-</sup> CTLs. CTLs were  
 935 stimulated with 1 $\mu$ g/ml anti-CD3, anti-CD28, anti-Armenian hamster IgG and anti-Syrian hamster IgG  
 936 for indicated times. **b**, Phosphorylation of ZAP70, BTK/ITK, ERK1/2 and Akt of WT and *Ldlr*<sup>-/-</sup> CTLs.  
 937 CTLs were stimulated as in (a) for 10 minutes. Data were analyzed by *t* test (n = 4). **c**, Immunoblotting  
 938 to detect the phosphorylation of CD3  $\zeta$  of M $\beta$ CD treated WT and *Ldlr*<sup>-/-</sup> CTLs. CTLs were stimulated  
 939 as in (a). **d**, Fluorescence staining of CD3 and LDLR in CTLs. Scale bar, 10 $\mu$ m. LSCM, laser confocal  
 940 scanning microscopy. **e**, Proximity Ligation Assay (PLA) analysis of CD3 and LDLR interaction in WT  
 941 and *Ldlr*<sup>-/-</sup> CTLs. Confocal images (left panel, scale bar, 20 $\mu$ m) and TIRFM images (right panel, scale  
 942 bar, 10 $\mu$ m) were shown. Red, CD3-LDLR interaction signal; Blue, DAPI. TIRFM, total internal  
 943 reflection fluorescence microscopy. **f**, CD3 $\epsilon$  was immunoprecipitated (IP) in CTLs and its interaction  
 944 with LDLR was analyzed by immunoblotting. **g**, HA-tagged LDLR was overexpressed in EL4 cells. The  
 945 EL4 cells were treated with M $\beta$ CD or not and then HA-tagged LDLR was immunoprecipitated with anti-  
 946 HA antibody. The interaction between LDLR and CD3 was analyzed by immunoblotting. **h**, **i**, WT and  
 947 *Ldlr*<sup>-/-</sup> CTLs were treated with BFA (5 $\mu$ g/ml) or not for 2 hours. CD3 expression was analyzed by flow  
 948 cytometry. Data were analyzed by *t* test (n = 3). \*, *P* < 0.05; \*\*, *P* < 0.01; \*\*\*\*, *P* < 0.0001. Error bars  
 949 denote for the s.e.m.

950



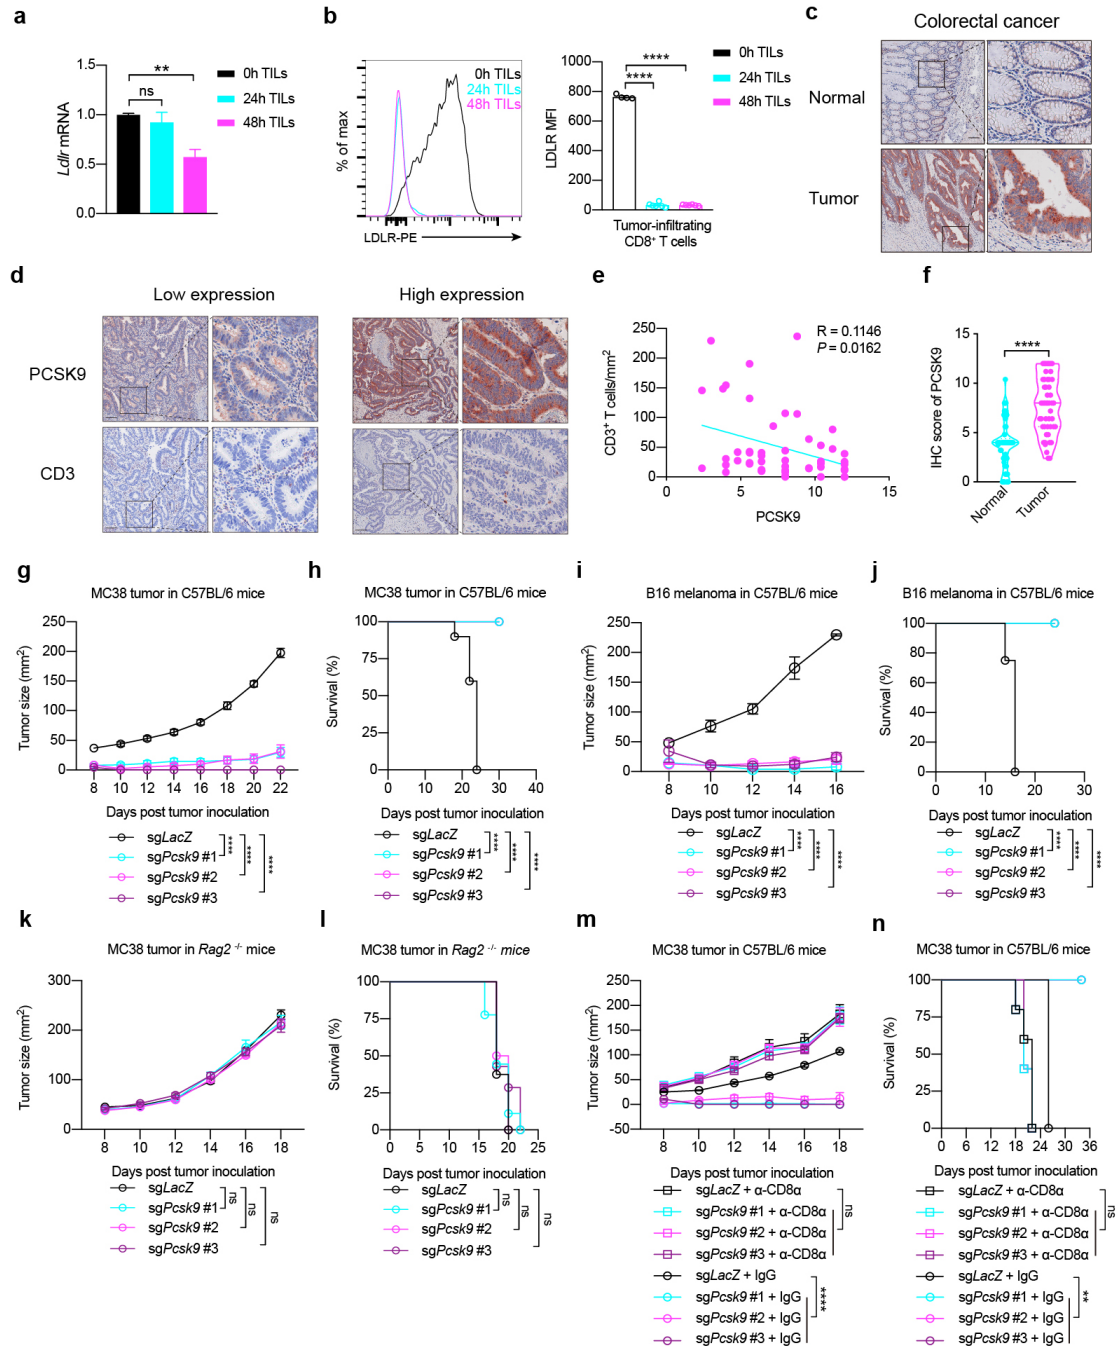

951

952 **Figure 4. Tumor-derived PCSK9 inhibits the antitumor activity of CD8<sup>+</sup> T cells**

953 **a**, LDLR expression was assessed in tumor infiltrating CD8<sup>+</sup> T cells (TILs) at 0, 24 or 48 hours post  
 954 adoptive transfer. Data were analyzed by *t* test (n = 4-6). **b, c**, Human normal or tumor colorectal sections  
 955 were stained with anti-PCSK9 antibody by immunohistochemistry and the abundance of PCSK9 was  
 956 assessed in (c). Data were analyzed by *t* test (n = 50). **d, e**, PCSK9 and CD3 staining were shown in  
 957 PCSK9 low-expression and high-expression tumors. Pearson correlation coefficient (R) and *P* value (*P*)  
 958 of PCSK9 expression and CD3<sup>+</sup> cells infiltration were analyzed in (e). **f, g**, Tumor growth (f) and survival  
 959 (g) of *Pcsk9* knockout MC38 tumor-bearing C57BL/6 mice. Data were analyzed by two-way ANOVA  
 960 (n = 10). **h, i**, Tumor growth (h) and survival (i) of *Pcsk9* knockout B16F10 melanoma-bearing C57BL/6  
 961 mice. Data were analyzed by two-way ANOVA (n = 7-8). **j, k**, Tumor growth (j) and survival (k) of  
 962 *Pcsk9* knockout MC38 tumor-bearing *Rag2*<sup>-/-</sup> mice. Data were analyzed by two-way ANOVA (n = 7-9).



963 **l, m**, Tumor growth (l) and survival (m) of *Pcsk9* knockout MC38 tumor-bearing C57BL/6 mice with  
964 CD8 $\alpha^+$  cells depletion. Data were analyzed by two-way ANOVA (n = 5-6). Scale bar, 120 $\mu$ m. ns, no  
965 significance; \*\*,  $P < 0.01$ ; \*\*\*\*,  $P < 0.0001$ . Error bars denote for the s.e.m.

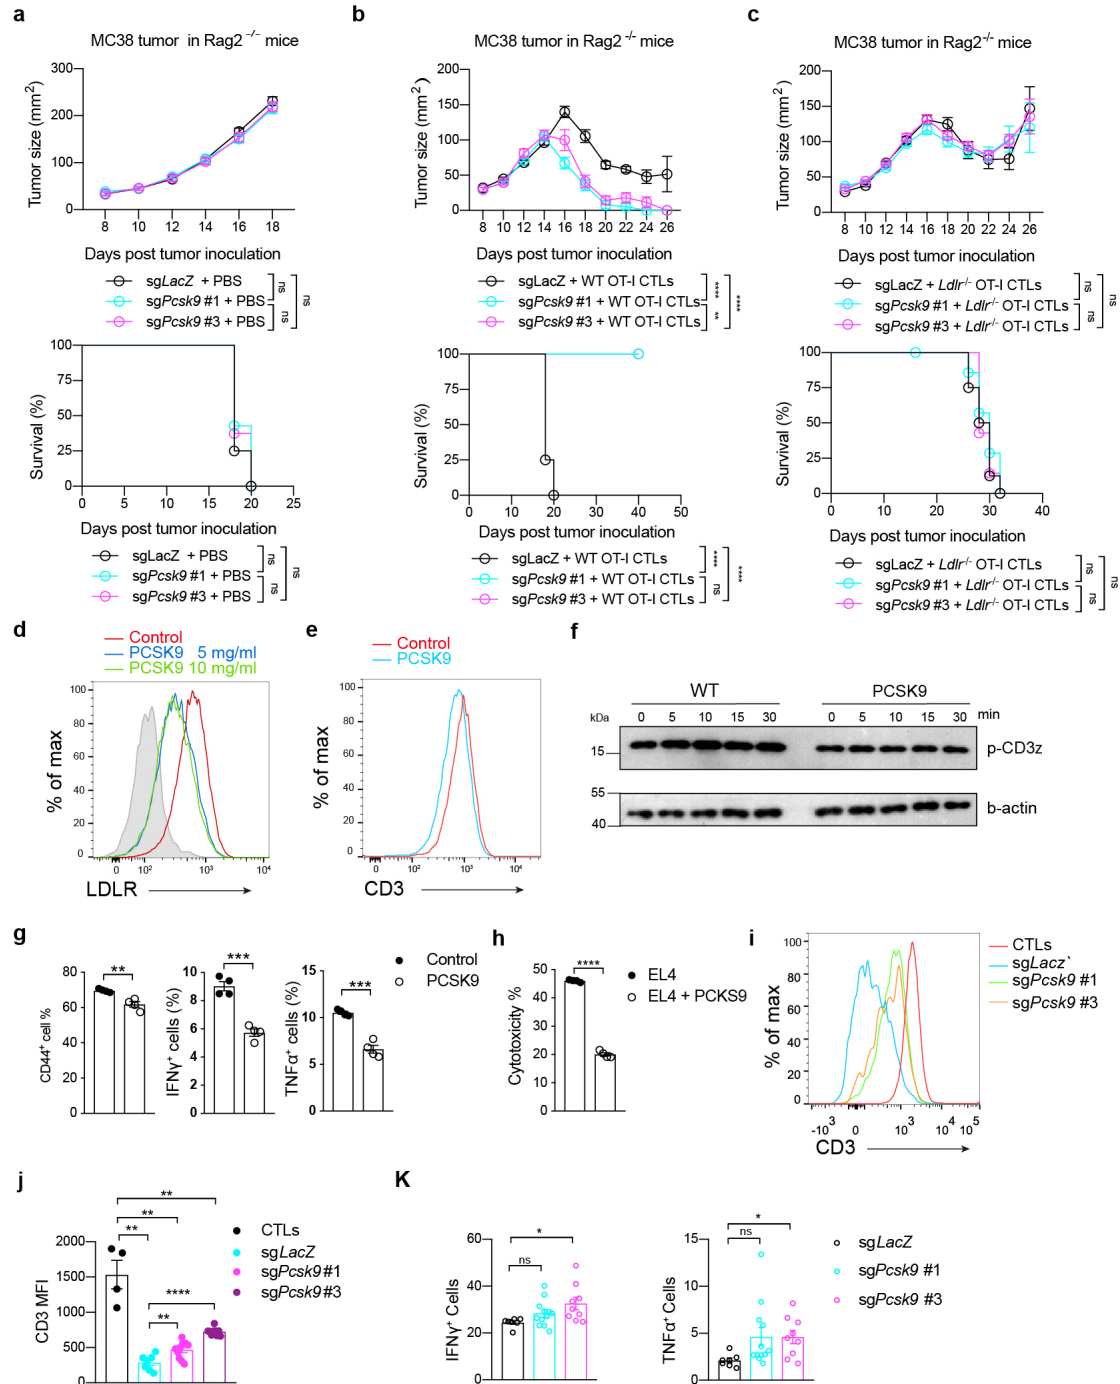

966

967 **Figure 5. PCSK9 inhibits CD8<sup>+</sup> T cell antitumor activity via LDLR and TCR signaling inhibition**

968 **a-c**, Tumor growth and survival of *Pcsk9* knockout MC38-OVA tumor-bearing *Rag2*<sup>-/-</sup> mice after  
 969 adoptive transfer of PBS (a), WT CTLs (b) or *Ldlr*<sup>-/-</sup> CTLs (c). Data were analyzed by two-way ANOVA  
 970 (n=7-8). **d**, LDLR expression was measured in PCSK9-treated CTLs by flow cytometry. CTLs were  
 971 treated with PCSK9 protein at indicated concentrations for 6 hours. **e**, CTLs were treated with 5 $\mu$ g/ml  
 972 PCSK9 protein for 6 hours. CD3 expression was measured by flow cytometry. **f**, Immunoblotting to  
 973 detect the phosphorylation of CD3  $\zeta$  in control and PCSK9-treated CTLs. CTLs were pretreated with  
 974 5 $\mu$ g/ml PCSK9 protein for 6 hours and stimulated with 1 $\mu$ g/ml anti-CD3, anti-CD28, anti-Armenian  
 975 hamster IgG and anti-Syrian hamster IgG for indicated times. **g**, T cell activation and cytokine  
 976 productions of PCSK9 treated activated CD8<sup>+</sup> T cells. Naïve CD8<sup>+</sup> T cells were isolated and stimulated

977 with 2µg/ml anti-CD3 and anti-CD28 in the presence or absence of PCSK9 protein (5 µg/ml). Data were  
978 analyzed by *t* test (n=4). **h**, Cytotoxicity of WT CTLs cocultured with PCSK9 overexpressed EL4 cells.  
979 PCSK9 was overexpressed in EL4 cells by retrovirus infection. CTLs were cocultured with the EL4 cells  
980 to determine the cytotoxicity. Data were analyzed by *t* test (n=4). **i, j**, CD3 surface levels were analyzed  
981 by flow cytometry in CTLs and TILs isolated from *Pcsk9* knockout MC38-OVA tumors at Day7 post  
982 adoptive transfer. Data were analyzed by *t* test (CTLs, n = 4; TILs, n = 7-10). **l**, IFN $\gamma$  production in  
983 isolated TILs of *Pcsk9* knockout MC38-OVA tumors. ns, no significance; \*,  $P < 0.05$ ; \*\*,  $P < 0.01$ ; \*\*\*,  
984  $p < 0.001$ ; \*\*\*\*,  $P < 0.0001$ . Error bars denote for the s.e.m.  
985

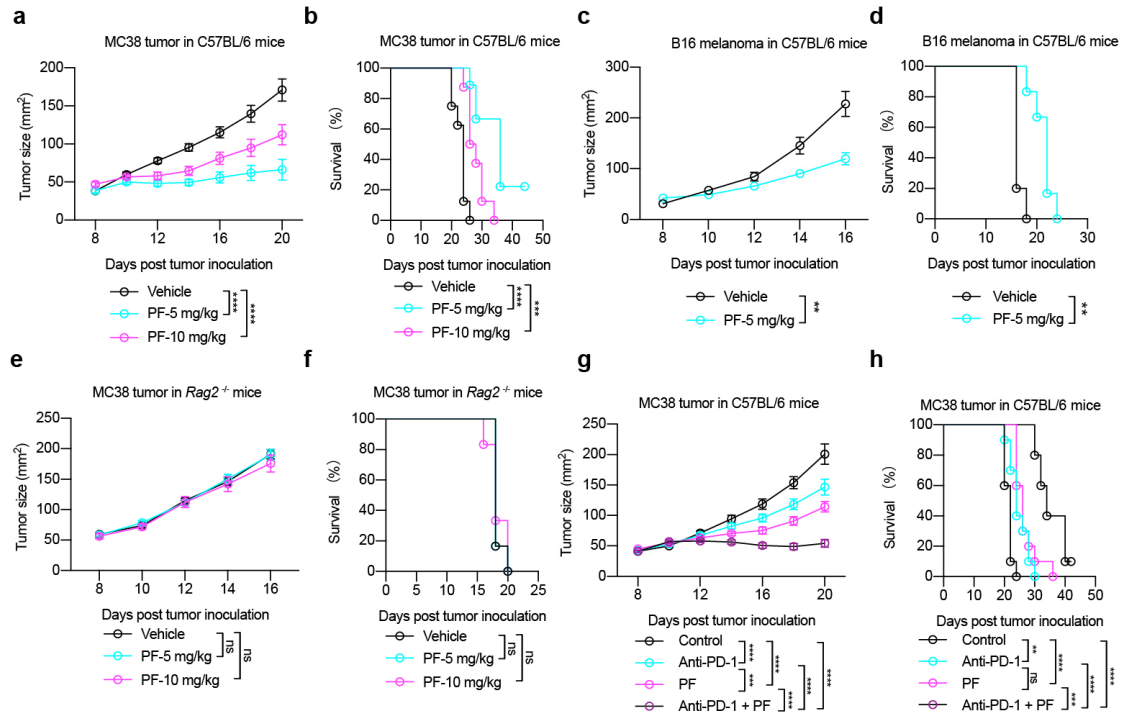

986

987 **Figure 6. Inhibiting PCSK9 potentiating the antitumor activity of CD8<sup>+</sup> T cells**

988 **a, b**, Tumor growth (a) and survival (b) of MC38 tumor-bearing C57BL/6 mice. Vehicle, 5mg/kg or  
 989 10mg/kg PF0644684 were injected intraperitoneally every 2 days. Data were analyzed by two-way  
 990 ANOVA (n = 8-9). **c, d**, Tumor growth (c) and survival (d) of B16F10 melanoma-bearing C57BL/6 mice.  
 991 Vehicle or 5mg/kg PF0644684 were injected intraperitoneally every 2 days. Data were analyzed by  
 992 two-way ANOVA (n = 8-9). **e, f**, Tumor growth (e) and survival (f) of MC38 cells on Rag2<sup>-/-</sup> mice.  
 993 PF0644684 was injected intraperitoneally as in (a, b). Data were analyzed by two-way ANOVA (n =  
 994 6). **g, h**, A combined therapy (PF0644684 and anti-PD-1) or monotherapies (PF0644684 or anti-PD-1)  
 995 in treating MC38 tumors on C57BL/6 mice. Tumor growth (g) and survival (h) were shown. Data were  
 996 analyzed by two-way ANOVA (n = 10). ns, no significance; \*\*, *P* < 0.01; \*\*\*, *P* < 0.001; \*\*\*\*, *P*  
 997 < 0.0001. Error bars denote for the s.e.m.

998

999 **Supplementary Figures**

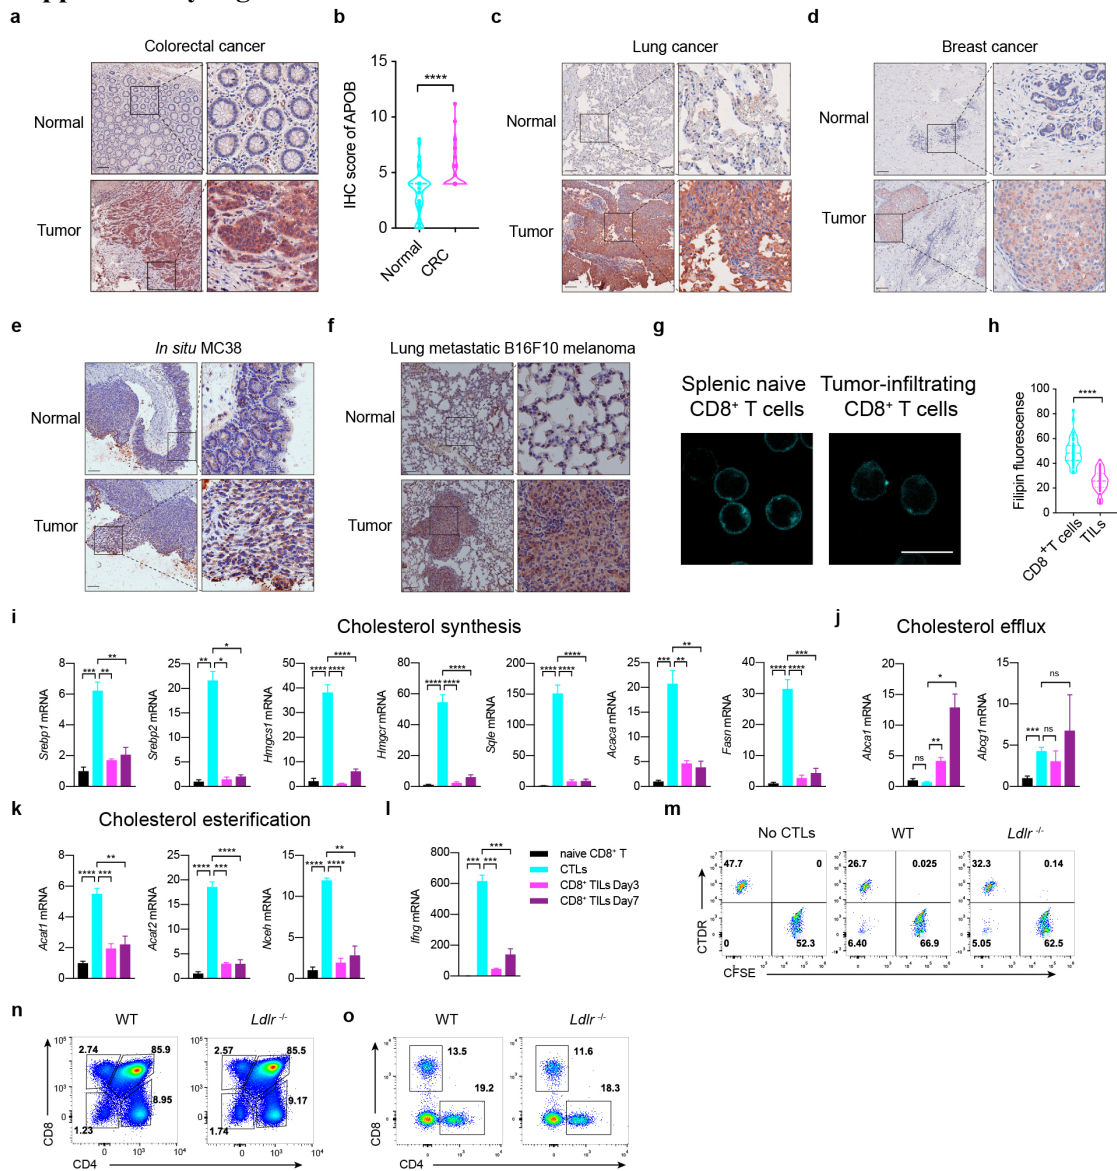

1000

1001

**Supplementary figure 1. LDLR deficiency hinders the antitumor activity of CD8<sup>+</sup> T cells.**

1002

**(related to Figure 1)**

1003

**a-b**, Human normal colorectal sections or tumor sections were stained with anti-APOB antibody by immunohistochemistry and the abundance of APOB was assessed in **(b)**, (n = 50). **c**, Human normal lung

1004

or tumor sections were stained with anti-APOB antibody by immunohistochemistry. **d**, Human normal breast or tumor sections were stained with anti-APOB antibody by immunohistochemistry. **e**, MC38 cells

1005

were injected into the cecum of C57BL/6 mice and the tumor sections were stained with anti-APOB antibody by immunohistochemistry. **f**, B16F10 cells were intravenously injected into C57BL/6 mice to

1006

induce the lung metastasis of melanoma. The tumor sections were stained with anti-APOB antibody by immunohistochemistry. Scale bar, 120µm(**a-f**). **g-h**, Filipin III staining to analyse cellular cholesterol

1007

distribution in splenic naive and tumor-infiltrating CD8<sup>+</sup> T cells. The Filipin fluorescence was analyzed in **(h)**. Scale bar, 10µm. **i-l**, Transcriptional levels of cholesterol synthesis **(i)**, efflux **(j)**, esterification **(k)**

1008

and *Ifng* as a control were analyzed by QPCR in naive CD8 T cells, CTL and CD8<sup>+</sup> TILs (isolated at Day3 or Day7 post adoptive transfer), (n = 4). **m**, Cytotoxicity of WT and *Ldlr*<sup>-/-</sup> CTLs. WT and *Ldlr*<sup>-/-</sup>

1009

OT-I CTLs were incubated with OVA-pulsed CTDR-labeled EL-4 cells and CFSE-labeled non-pulsed

1010

OT-I CTLs were incubated with OVA-pulsed CTDR-labeled EL-4 cells and CFSE-labeled non-pulsed

1011

OT-I CTLs were incubated with OVA-pulsed CTDR-labeled EL-4 cells and CFSE-labeled non-pulsed

1012

OT-I CTLs were incubated with OVA-pulsed CTDR-labeled EL-4 cells and CFSE-labeled non-pulsed

1013

OT-I CTLs were incubated with OVA-pulsed CTDR-labeled EL-4 cells and CFSE-labeled non-pulsed

1014

OT-I CTLs were incubated with OVA-pulsed CTDR-labeled EL-4 cells and CFSE-labeled non-pulsed

1015

OT-I CTLs were incubated with OVA-pulsed CTDR-labeled EL-4 cells and CFSE-labeled non-pulsed

1016 EL-4 cells for 4 hours. **n-o**, T cell development analysis of thymocytes (**n**) and splenic (**o**) T cells of WT  
1017 and *Ldlr*<sup>-/-</sup> mice. \*,  $P < 0.05$ ; \*\*,  $P < 0.01$ ; \*\*\*,  $P < 0.001$ \*\*\*\*,  $P < 0.0001$ . Error bars denote for the  
1018 s.e.m.  
1019

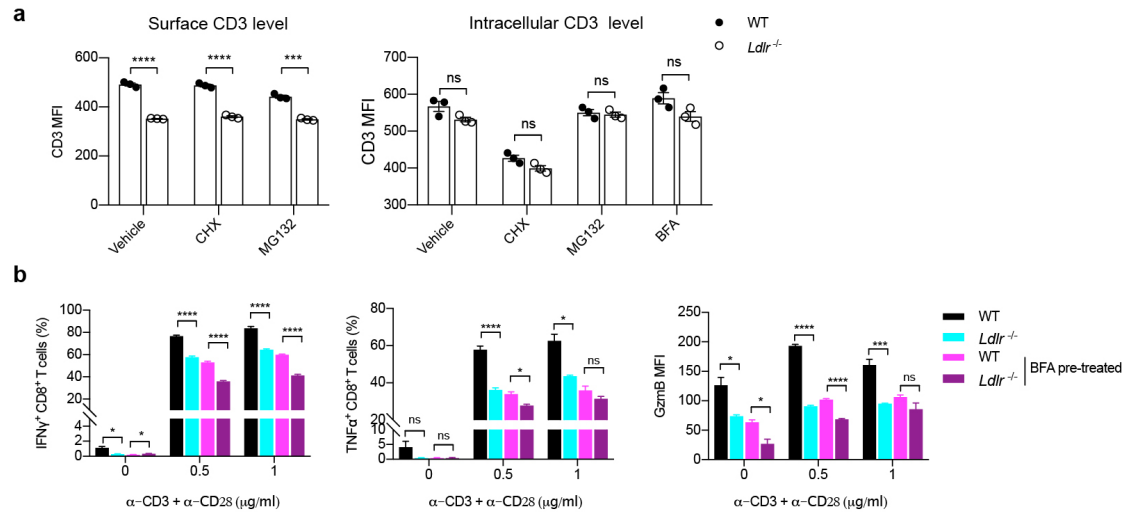

1020

1021 **Supplementary figure 2. LDLR binds to TCR and regulate TCR signaling in CD8<sup>+</sup> T cells.**

1022 **(related to Figure 3)**

1023 **a**, CTLs were treated with CHX (50 $\mu$ g/ml), MG132 (15 $\mu$ M), BFA (5 $\mu$ g/ml) or not for 2 hours. Surface  
1024 levels (left panel) and intracellular levels (right panel) of CD3 were analyzed by flow cytometry. Data  
1025 were analyzed by *t* test (n = 3). **b**, Cytokine and granule productions of WT and *Ldlr*<sup>-/-</sup> CTLs. CTLs were  
1026 pretreated with BFA (5 $\mu$ g/ml) or not for 2 hours and stimulated with anti-CD3 and anti-CD28 antibodies  
1027 for 4 hours at indicated concentrations. Data were analyzed by *t* test (n = 4). ns, no significance; \*, *P* <  
1028 0.05; \*\*\*, *P* < 0.001; \*\*\*\*, *P* < 0.0001. Error bars denote for the s.e.m.

1029

1030



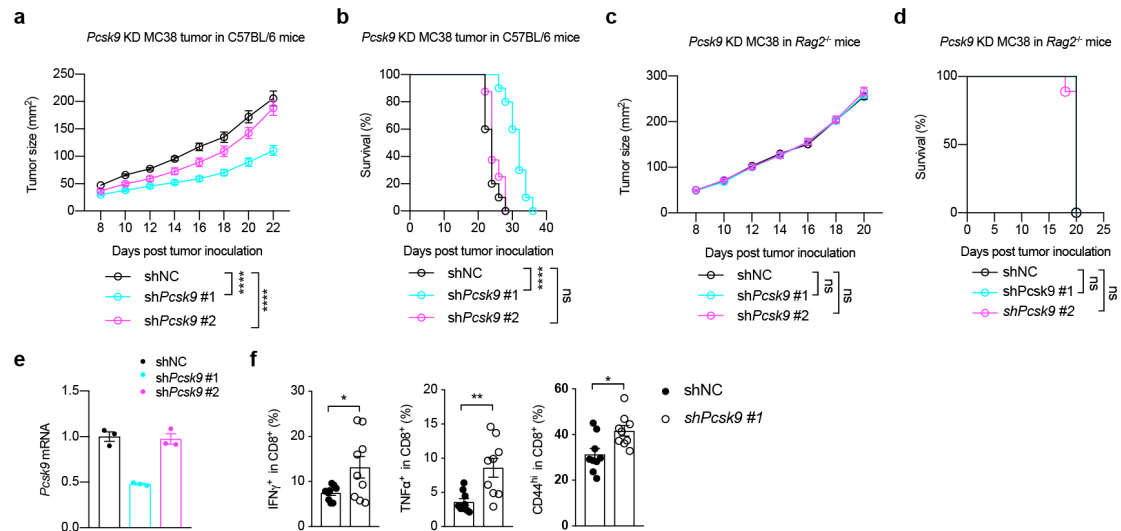

1031

1032

**Supplementary figure 3. Tumor-derived PCSK9 inhibits the antitumor activity of CD8<sup>+</sup> T cells (related to Figure 4)**

1033

1034

**a, b**, Tumor growth (**a**) and survival (**b**) of *Pcsk9* knockdown MC38 tumor-bearing C57BL/6 mice. Data were analyzed by two-way ANOVA (n = 8-10). **c, d**, Tumor growth (**c**) and survival (**d**) of *Pcsk9* knockdown MC38 tumor-bearing Rag2<sup>-/-</sup> mice. Data were analyzed by two-way ANOVA (n = 9).

1035

1036

**e**, Transcriptional level of *Pcsk9* was measured by QPCR in *Pcsk9* knockdown MC38 cells.

1037

**f**, Cytokine productions and activation of tumor infiltration CD8<sup>+</sup> T cells isolated from shNC or sh*Pcsk9* MC38

1038

tumors. Data were analyzed by *t* test (n = 9). ns, no significance; \*, *P* < 0.05; \*\*, *P* < 0.01; \*\*\*\*, *P*

1039

<0.0001. Error bars denote for the s.e.m.

1040

1041

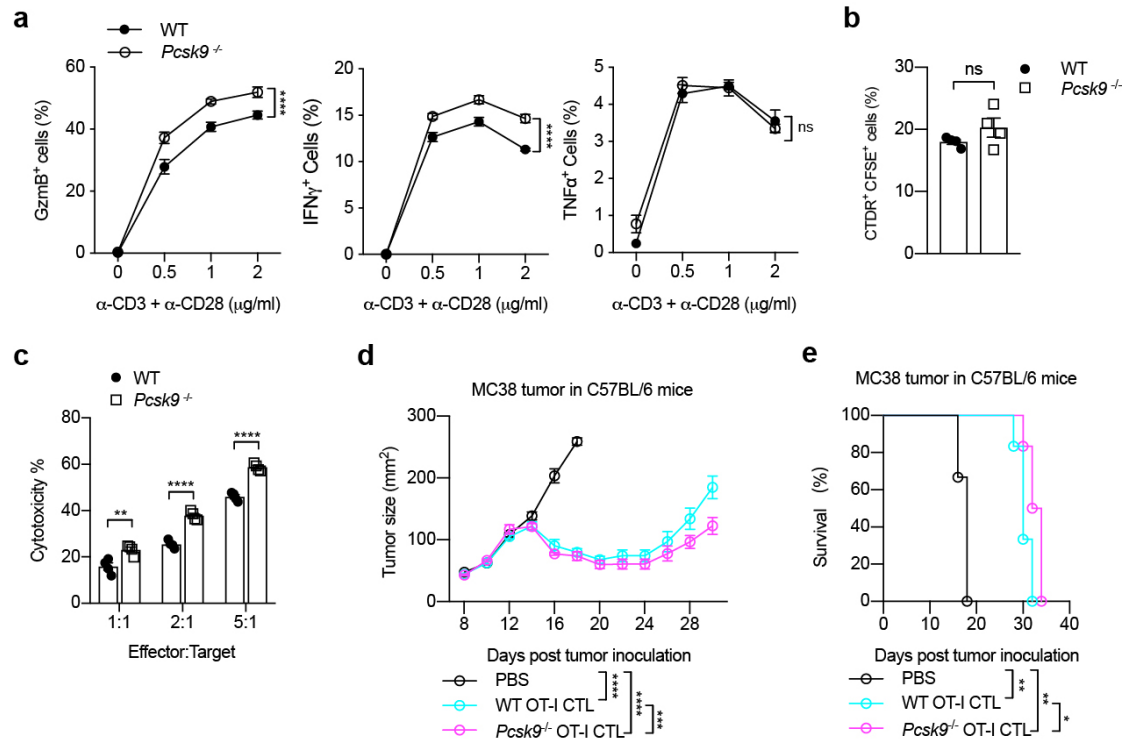

1042

1043

**Supplementary figure S4. Inhibiting PCSK9 potentiating the antitumor activity of CD8<sup>+</sup> T cells**

1044

**(related to Figure 5)**

1045

**a**, Cytokine/granule productions of WT and *Pcsk9*<sup>-/-</sup> CD8<sup>+</sup> T cells. CD8<sup>+</sup> T cells were isolated from the

1046

spleen of WT or *Pcsk9*<sup>-/-</sup> mice and stimulated with anti-CD3 and anti-CD28 antibodies at indicated

1047

concentrations for 24 hours. **b**, Synapse formation of WT and *Pcsk9*<sup>-/-</sup> CTLs. CFSE-labeled CTLs and

1048

CTDR-labeled OVA-pulsed EL4 cells were cocultured for 30 mins. Data were analyzed by *t* test (n = 4).

1049

**c**, Cytotoxicity of WT and *Pcsk9*<sup>-/-</sup> CTLs. CTLs were incubated with OVA-pulsed CTDR-labeled EL-4

1050

cells and CFSE-labeled non-pulsed EL-4 cells for 4 hours. Data were analyzed by *t* test (n = 4). **d**, **e**,

1051

Tumor growth (d) and survival (e) of MC38-OVA tumor-bearing Rag2<sup>-/-</sup> mice after adoptive transfer of

1052

PBS, WT or *Pcsk9*<sup>-/-</sup> CTLs. Data were analyzed by two-way ANOVA (n = 6). ns, no significance; \*, *P*

1053

< 0.05; \*\*, *P* < 0.01; \*\*\*, *P* < 0.001; \*\*\*\*, *P* < 0.0001. Error bars denote for the s.e.m.

1054

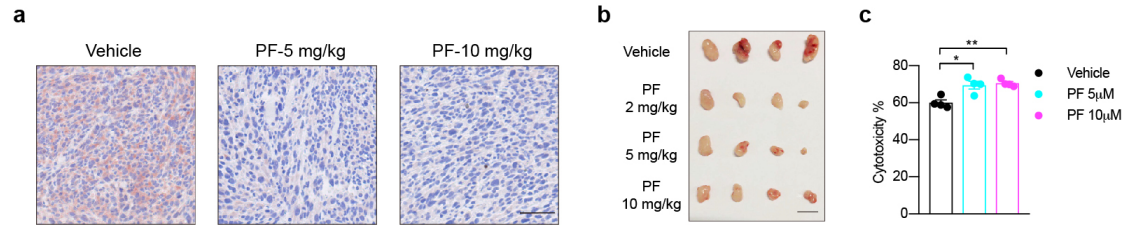

1055

1056

**Supplementary figure 5. Inhibiting PCSK9 potentiating the antitumor activity of CD8+ T cells (related to Figure 6)**

1057

1058

1059

1060

1061

1062

1063

1064

1065

**a**, PCSK9 expression was measured in MC38 tumor sections by immunohistochemistry. MC38 cells were subcutaneously injected into C57BL/6 mice and treated intraperitoneally with PCSK9 inhibitor PF0644684 every 2 days at indicated concentrations. Scale bar, 50µm. **b**, MC38 tumors were isolated from PF0644684 treated C57BL/6 mice and tumor size was shown. Scale bar, 10mm. **c**, Cytotoxicity of CTLs cocultured with PF0644684 treated EL4 cells. EL4 cells were pretreated with PF0644684 for 24 hours and cocultured with CTLs for 12 hours in the presence of PF0644684. Data were analyzed by *t* test (n = 4). \*, *P* < 0.05; \*\*, *P* < 0.01. Error bars denote for the s.e.m.
